1  
2  
3  
4  
5  
6  
  
  
  
  
  
7  
8  
9  
10  
11  
12  
13  
14  
15  
16  
17  
18  
19  
20  
21  
22

# Diagnostic value of chest ultrasound in children with cystic fibrosis.

Lidia Strzelczuk – Judka<sup>1</sup>, Irena Wojsyk – Banaszak<sup>2\*</sup>, Aleksandra Zakrzewska<sup>1</sup>, Katarzyna Jończyk – Potoczna<sup>1</sup>

<sup>1</sup>Department of Pediatric Radiology, Chair of General and Invasive Radiology, Poznan University of Medical Sciences, Poland

<sup>2</sup>Department of Pulmonology, Pediatric Allergy and Clinical Immunology, Poznan University of Medical Sciences, Poland

\*Corresponding author  
E-mail: iwojsyk@ump.edu.pl

# Abstract

Cystic fibrosis (CF) is one of the most common genetic disorders in the Caucasian population. The disease has a progressive course and leads to reduced life quality and life expectancy. Standard diagnostic procedures used in the monitoring of CF patients, include methods exposing patients to the ionizing radiation. With increasing life expectancy in CF the cumulative dose of ionising radiation increases, prompting clinicians' search for safer imaging studies. Despite its safety and availability lung ultrasound (LUS) is not routinely used in the diagnostic evaluation of CF patients.

The aim of the study was to evaluate the diagnostic value of LUS in children with CF compared to chest X-ray, and to assess the diagnostic value of the recently developed LUS score - CF-USS (Cystic Fibrosis Ultrasound Score).

LUS was performed in 48 CF children aged from 5 to 18 years (24 girls and 24 boys). LUS consisted in the assessment of the pleura, lung sliding, A-line and B-line artifacts, "lung rockets", alveolar consolidations, air bronchogram and pleural effusion. Chest radiography was performed in all patients and analyzed according to the modified Chrispin-Norman score. LUS was analyzed according to CF-USS.

Correlation between the CF-USS and the modified Chrispin-Norman scores were moderate ( $R=0.52$ ,  $p=0.0002$ ) and strong in control studies . In 75% of patients undergoing LUS, small areas of subpleural consolidations were observed, not visible on X-rays. At the same time, LUS was not sensitive enough to visualize bronchial pathology, which plays an important role in assessing the disease progression.

Conclusions:

LUS constitutes an invaluable tool for the diagnosis of subpleural consolidations. CF-USS results correlate with conventional x-ray modified Chrispin–Norman score. LUS should be considered an accessory radiographic examination in the monitoring of CF patients, and CF-USS may provide clinicians with valuable information concerning the disease progression.

# Introduction

Cystic fibrosis (CF) is one of the most common autosomal recessive hereditary life-shortening disorders in Caucasian populations [1,2]. The disease is caused by the mutation of gene coding CFTR protein (*Cystic Fibrosis Transmembrane Conductance Regulator*), leading to the production of dense mucus in the airways and exocrine glands and the impairment of their function. The main affected systems comprise respiratory and digestive systems, and the chronic pulmonary disease remains the main cause of morbidity and one of the most important prognostic factors in CF [1,3,6]. Chronic inflammation due to impaired mucocilliary clearance and mucus impaction in the airways results in bronchiectasis and progressive lung tissue destruction [5].

Lung evaluation in CF patients traditionally avails of imaging studies and among these the most commonly used remains chest x-ray. Early in the course of disease the radiologic picture might reveal no abnormalities. Along with the disease progression lung hyperinflation and increased bronchial markings appear, followed by chest infiltrates, atelectasis and bronchiectasis [1,6].

The need for objective tools for the evaluation of patients has prompted the development of x-ray scoring systems including Brasfield score [7] Northern score [4] Chrispin-Norman score [8] and its modified version [9]. These scoring systems are used for the monitoring of disease progression, evaluation of different therapies as well comparison of patients' outcomes between the treatment centres [4,8–14].

The most accurate radiographic diagnostic modality in CF, so called „golden standard” that allows for qualitative and quantitative evaluation of lung involvement, even very early in the course of the disease remains computed tomography (CT) [6]. CT due to its high resolution allows visualisation of the details that are not visible in the plain chest x-ray [10]. In CF patients CT enables visualisation of bronchial wall and peribronchial thickening, intralobular nodules, bronchiolitis, so called „tree in bud” sign, air trapping, bronchiectasis, mucus impaction, microabscesses, infiltrates, atelectasis, enlarged lymph nodes and widening of pulmonary artery with narrowing of peripheral vessels [5,15,16]. The role of CT in CF patients was confirmed in studies reporting on correlation of CT scans with patients outcomes [17]. For quantitative, objective evaluation of CT results in CF patients scoring systems were also developed with the most popular Bhalla score [18].

Disadvantage of CT scanning is a relatively high dose of ionising radiation. The risks of cancer related to lifetime exposure to radiation made clinicians look for imaging modalities with the lowest or ideally no radiation [19]. Ultrasound (US) is currently one of the most important and

most frequently used imaging techniques [20]. Considering this, lung ultrasound (LUS) as a safe, non-invasive, widely available and cheap technique might constitute an important tool in the diagnostic protocols of children with CF [21]. Despite this fact there are few existing reports on LUS application in CF patients. There are only two reports published as abstracts by Ciuca et al on LUS in CF as compared to CT scans [22,23].

LUS examination comprise evaluation of pleural line and lung sliding [24–28], analysis of the artefacts that are present in normal lung, like „the bat sign” [24,25,29,30] and the A-line artefacts [25,28,31,32] as well as in pathological conditions (the B-line, Z-line and I-line artefacts) and evaluation of thoracic wall structures. The B-lines are vertical, well defined hyperechogenic lines, arising from the pleural line, spreading out without fading to the edge of the screen, similar to laser beam or „comet tail” artefact [25,33,34]. Multiple B-lines are typical for interstitial lung disease [35–37]. Seen together they are described as „lung rockets” artefact [28,32,37]. Multiple coalescent B-lines in the absence of A-lines with visible lung sliding constitute so called „white lung” image [37–39]. Alveolar consolidation can be diagnosed with LUS provided their peripheral localisation and according to the literature reports that is the case in up to 98.5% of cases [24,29,32].

## Objective

The aim of our report was to evaluate the diagnostic value of chest ultrasound in children with CF as compared to plain x-ray, as well as to assess the diagnostic value of the recently developed LUS score - CF-USS (Cystic Fibrosis Ultrasound Score).

## Material

We enrolled 48 Caucasian patients (24 males) aged 5 to 18 years diagnosed with CF who were admitted to the Pulmonology Department for scheduled annual diagnostic workup. Patients underwent chest ultrasound and plain x-ray, and the time interval between the studies were not longer than 72 hours.

In all the studied children CF was confirmed by two positive sweat test results and genetic studies (two pathogenic mutations). All the patients and their parents gave informed consent for the study. Exclusion criteria comprised severe immunosuppression, lack of consent and time interval longer than 72 hours between the studies. The study design was accepted by the Bioethical Committee of Poznań University of Medical Sciences. In Table 1 we presented the characteristic of the studied patients.

120

121 **Table 1.** Patients characteristic

|                                                |                |                          |
|------------------------------------------------|----------------|--------------------------|
| Number of patients                             | 48             |                          |
| Males/females                                  | 24 / 24        |                          |
|                                                | Mean $\pm$ SD  | Median (minimum-maximum) |
| Age (years)                                    | 11.9 $\pm$ 3.9 | 12 (5-18)                |
| BMI                                            | 16.7 $\pm$ 2.9 | 15.7 (10.2-24.2)         |
| FEV <sub>1</sub> (L)                           | 1.9 $\pm$ 0.8  | 1.7 (0.4 - 4.3)          |
| BMI <3c N(%)                                   | 7 (14.6)       |                          |
| Pancreatic sufficient N (%)                    | 9 (18.8)       |                          |
| F508del homozygous N(%)                        | 21 (43.8)      |                          |
| F508del heterozygous N(%)                      | 18 (37.5)      |                          |
| Chronically infected with <i>P. aeruginosa</i> | 21 (43.8)      |                          |
| FEV <sub>1</sub> $\geq$ 80% normal value       | 32 (66.7)      |                          |
| FEV <sub>1</sub> $\leq$ 40% normal value       | 1 (2.1)        |                          |

122

123

## 124 **Methods**

### 125 **Radiographic imaging**

126

127 X-rays were performed with an analogue apparatus Axiom Iconos R 100 (Siemens  
 128 Healthcare), in posteroanterior projection during suspended inspiration. Technical parameters of the  
 129 images (including use of grid, the source image receptor distance, dose of radiation) were  
 130 individually adjusted for every studied patient in concordance with ALARA (As Low As  
 131 Reasonably Achievable) principle in order to achieve best possible images using the lowest  
 132 radiation dose. No lateral x-rays were performed. X-rays were independently evaluated by two

board certified paediatric radiologists with experience in CF. Chest x-rays were evaluated using modified Chrispin-Norman score [9].

## **Chest ultrasound (LUS)**

Chest ultrasound was performed with iU22 apparatus (Philips, Biothel United States) using linear probe of 5 – 12 mHz (L12-5) frequency and depending on the patients' age with either convex probe of 1 - 5 mHz (C5-1) frequency, convex probe of 4 - 9 mHz (C9-4) frequency or microconvex probe of 5 – 8 mHz (C8-5) frequency through longitudinal and transverse sections of anterior, lateral and posterior wall of the chest. Preliminary preset was soft tissue excluding artefact reduction options (SonoCT, XRes). Doppler imaging was used for the evaluation of vascularisation of the inflammatory changes.

Patients were examined in the sitting position. The studies were performed by two board certified paediatric radiologists with experience in LUS and CF.

In every patient we evaluated the quality (free flowing or organised, localization) and quantity (fluid layer in millimetres) of any fluid present in the pleural space, the shape and thickness of the pleural line, the lung sliding sign, A-lines and B-lines artefacts (their number, localisation and morphology, including single ones as well as „lung rockets” complexes and “white lung” images) and alveolar consolidations (their number, dimensions, localisation, morphology, presence of bronchogram and its characteristic (air or fluid) and vascularisation).

LUS results were classified according scoring system developed by the authors: CF-USS (*Cystic Fibrosis Ultrasound Score*) devised on the basis of modified Chrispin-Norman score and bronchiolitis score reported by Caiulo and collaborators [39,40]. Scores are calculated separately for anterior and posterior surface of right and left half of the thorax. Each part can be scored from 0 to 2 points for irregularities of pleural line, single and complex B-line artefacts, alveolar consolidations and the presence of fluid in the pleural space with the maximum score of ten for each part and 40 in total. The higher the score, the more advanced the disease process (Table 2).

165 **Table 2.** Cystic Fibrosis Ultrasound Score

| Characteristic                     | Intensity         |                                    |                                                   |
|------------------------------------|-------------------|------------------------------------|---------------------------------------------------|
| <b>Pleural irregularities</b>      | Absent            | Present                            | Present+ pleural thickening                       |
| Right lung: anterior surface       | 0                 | 1                                  | 2                                                 |
| posterior surface                  | 0                 | 1                                  | 2                                                 |
| Left lung: anterior surface        | 0                 | 1                                  | 2                                                 |
| posterior surface                  | 0                 | 1                                  | 2                                                 |
| <b>Focal B-line artefacts</b>      | Absent / few (≤6) | Some (7-14)                        | Many (≥15)                                        |
| Right lung: anterior surface       | 0                 | 1                                  | 2                                                 |
| posterior surface                  | 0                 | 1                                  | 2                                                 |
| Left lung: anterior surface        | 0                 | 1                                  | 2                                                 |
| posterior surface                  | 0                 | 1                                  | 2                                                 |
| <b>Coalescent B-line artefacts</b> | Absent            | Fused                              | „Lung rockets”                                    |
| Right lung: anterior surface       | 0                 | 1                                  | 2                                                 |
| posterior surface                  | 0                 | 1                                  | 2                                                 |
| Left lung: anterior surface        | 0                 | 1                                  | 2                                                 |
| posterior surface                  | 0                 | 1                                  | 2                                                 |
| <b>Subpleural consolidations</b>   | Absent (≤6)       | Some (7-14)                        | Multiple or extensive (≥15)                       |
| Right lung: anterior surface       | 0                 | 1                                  | 2                                                 |
| posterior surface                  | 0                 | 1                                  | 2                                                 |
| Left lung: anterior surface        | 0                 | 1                                  | 2                                                 |
| posterior surface                  | 0                 | 1                                  | 2                                                 |
| <b>Pleural fluid</b>               | Absent            | Obliterating phreno – costal angle | In phreno – costal angle and along the chest wall |
| Right lung: anterior surface       | 0                 | 1                                  | 2                                                 |
| posterior surface                  | 0                 | 1                                  | 2                                                 |
| Left lung: anterior surface        | 0                 | 1                                  | 2                                                 |
| posterior surface                  | 0                 | 1                                  | 2                                                 |

# Statistical analysis

Statistical analysis was performed with Statistica software (version 12; StatSoft). Data distribution was evaluated with Shapiro-Wilk test. For data with normal distribution we used t Student test for paired and independent variables. For data that do not meet the normal distribution assumptions Spearman's rank correlation coefficient was calculated. P value of <0.05 were considered statistically significant.

# Results

## Comparison of LUS and chest x-ray images

Pulmonary disease was evaluated radiologically with modified Chrispin – Norman score for x-rays and CF-USS score. The patients' results are shown in Table 3, Figures 1 and 2. Statistical analysis has shown positive correlation between the two scoring systems (R Spearman= 0.52, p=0.0002) (Fig 3).

**Table 3.** Comparison of two scoring systems

| Parametr                 | Modified Chrispin – Norman score | CF-USS    |
|--------------------------|----------------------------------|-----------|
| Number of patients       | 48                               | 48        |
| Mean ± SD                | 8.7 ± 8.0                        | 4.4 ± 4.1 |
| Median (minimum-maximum) | 7 (0-28)                         | 4 (0-16)  |

**Fig 1.** The modified Chrispin-Norman scores.

**Fig 2.** The CF-USS scores.

**Fig 3.** Correlation between CF-USS and the modified Chrispin-Norman scores.

Fine subpleural consolidation were seen in LUS in 36 patients (75%). Abnormalities seen in LUS in the studied patients classified according to CF-USS are presented in Table 4.



193

194 **Table 4.** Number of patients in the studied group with abnormalities according to the CF-USS score.

| Characteristic                   | Number of patients | Percentage (%) |
|----------------------------------|--------------------|----------------|
| <b>Pleural irregularities</b>    | 1                  | 2              |
| <b>Focal B-line artefacts</b>    |                    |                |
| Some                             | 33                 | 69             |
| Many                             | 4                  | 8              |
| <b>Fused B-line artefacts</b>    |                    |                |
| Coalescent                       | 19                 | 40             |
| „Lung rockets”                   | 1                  | 2              |
| <b>Subpleural consolidations</b> |                    |                |
| Few                              | 28                 | 58             |
| Multiple or extensive            | 8                  | 17             |
| <b>Pleural fluid</b>             |                    |                |
| In costo – phrenical angle       | 9                  | 19             |
| And along the chest wall         | 2                  | 4              |

195

196

197

198 In nine patients LUS and x-ray were performed twice on two different occasions. There were no  
199 statistically significant differences between the x-rays in modified Chrispin – Norman score  
200 ( $15.22 \pm 2.71$  vs.  $10.78 \pm 3.00$ ;  $p=0.06$ ) and LUS in CF-USS score ( $7.56 \pm 1.58$  vs.  $5.33 \pm 1.86$ ;  $p=0.29$ )  
201 (Fig 4 and Fig 5). Statistical analysis for the repeated LUS and x-ray examinations showed positive  
202 correlation for the two studies ( $R_{\text{Spearman}}=0.81$ ,  $p=0.01$ ) (Fig 6).

203 **Fig 4. Modified Chrispin – Norman scores for the repeated studies.**

204 1. Modified Chrispin – Norman scores in the first study; 2. Modified Chrispin – Norman  
205 scores in the repeated study

206 **Fig 5. CF-USS scores for the repeated studies.**

207 1. CF-USS scores in the first study; 2. CF-USS scores in the repeated study

208 **Fig 6. Correlation between the CF-USS score and the modified Chrispin-Norman score in the**  
209 **repeated studies.**

210 In the figures 7-11 chest x-ray and LUS images of the studied patients are presented.

211

## 212 **Fig 7.**

213 Mediastinal shift, atelectasis and pleural effusion on the right, linear and cystic opacities,  
214 bronchiectasis, consolidations. Hyperinflation of the left lung, with nodular and linear interstitial  
215 opacities. 27 points in modified Chrispin-Norman score.

## 216 **Fig 8.**

217 LUS image of the patient from Fig 7, linear probe. Regions of consolidation and atelectasis. 17  
218 points in CF-USS.

## 219 **Fig 9.**

220 Linear opacities and regions of consolidations in the middle right and lower left field. Fine  
221 peribronchial infiltrates in the lower right and middle left field. Hyperinflation of both lungs. 15  
222 points in modified Chrispin-Norman score.

## 223 **Fig 10.**

224 LUS image of the patient from Fig 7, linear probe. Large area of consolidation in the right upper  
225 lobe. 5 points in CF-USS.

## 226 **Fig 11.**

227 LUS image of the patient from Fig 7, linear probe. Fine subpleural consolidation.

## 228 **Discussion**

229  
230 Cystic fibrosis is a life-shortening genetic disorder, involving respiratory system and  
231 requiring chronic therapy. In the course of the disease patients suffer recurrent exacerbations, that  
232 affect patients quality of life and survival. Radiology plays a significant role in patients' follow-up,  
233 enabling monitoring of the disease, response to treatment as well as the diagnosis of exacerbations  
234 [41]. Unfortunately conventional x-rays, especially numerous, repeated in the course of disease add  
235 up to cumulative ionising radiation dose. Diminishing radiation exposure, by looking for alternative  
236 diagnostic modalities, should be considered as one of the goals of contemporary medicine.

237 Chest ultrasound has not been routinely used in the monitoring of lung disease in paediatric  
238 patients with CF, despite its lack of radiation, availability and safety. Considering this we wanted to  
239 compare diagnostic value of LUS with conventional chest x-rays assessed according to the modified  
240 Chrispin – Norman score. There are no other studies comparing modified Chrispin – Norman score  
241 with chest ultrasound in CF paediatric patients. Furthermore, we developed our own ultrasound  
242 scoring system: CF-USS to make the comparison more feasible

243 For the evaluation of chest x-ray we chose modified Chrispin – Norman score as it uses only  
244 antero – posterior projections for the evaluation of the hyperinflation of the chest based on the shape

245 of the thorax, diaphragm location and lung hyperlucency resulting from air-trapping [9]. That stays  
 246 in agreement with the Benden et al. data and allows for the diminished radiation dose while  
 247 avoiding the lateral projection [9]. Terheggen-Lagro and colleagues in their study compared six  
 248 different clinical and radiological scoring systems (Schwachman – Kulczycki score, Chrispin-  
 249 Norman score, modified Chrispin-Norman score, Brasfield score, Wisconsin score and Northern  
 250 score) and demonstrated their clinical utility in different clinical settings [14]. Authors proved, that  
 251 radiographic scoring systems in the CF patients, especially modified Chrispin-Norman score are  
 252 characterized by low interobserver variability and correlate with pulmonary function tests results as  
 253 well as clinical features.

254 The aim of the study was to compare the results of x-ray scoring system with chest  
 255 ultrasound scoring system. Furthermore we constructed a novel chest ultrasound score for the  
 256 evaluation of CF paediatric patients (CF-USS). The score has been developed based on the  
 257 experience of Caiulo and colleagues, who used LUS in patients with bronchiolitis, the pathology,  
 258 that among others is also present in the CF patients [5,15,40,42].

259 LUS was performed at the same time as the chest x-ray. In nine patients LUS were  
 260 performed twice on two different occasions. The most commonly seen pathological features were  
 261 B-line artefacts of different number and intensity. B-line artefacts might be seen in a normal lung  
 262 and are not considered pathological as long as their number does not exceed 2 in a single transverse  
 263 scan with a convex probe and 6 in a single longitudinal scan with a high resolution linear probe  
 264 [32].

265 Clinical relevance of B-line artefacts is quite wide and has recently been covered in an  
 266 excellent review by Dietrich and colleagues [43]. The authors believe, that B-line artefacts can be  
 267 caused by multiple factors, and be present in lung oedema, heart failure, lung interstitial diseases,  
 268 infections, acute respiratory distress syndrome (ARDS) or lung injury. B-line artefacts are the sign  
 269 of increased lung density due to the loss of the lung tissue aeration. Chiesa and colleagues found B-  
 270 line artefacts in 37% of elderly studied as compared to 10% of healthy young adults [44]. Correct  
 271 B-line artefacts interpretation should account for the evaluation of other LUS signs and clinical data.  
 272 In the pathological conditions B-line artefacts may be useful for the monitoring of treatment. The  
 273 influence of technical factors on the appearance of B-line artefacts still remains to be elucidated  
 274 [43].

275 In our LUS scoring system (CF-USS) B-line artefacts are divided into focal (few, some and  
 276 many) and coalescent (absent, fused and “lung rockets”). The scoring system reflects intensity and  
 277 variability of the lung pathology, known as B-line artefacts. Despite statistically significant  
 278 correlation between the two studied scores in our material, we believe that true clinical significance

279 of B-line artefacts, in a single LUS examination without clinical data has important limitations. In  
280 the children with CF B-line artefacts should be evaluated in the context of disease progression,  
281 documenting their numbers and localisation [45].

282 Another pathology seen in LUS are subpleural consolidations. Very fine 3 to 4 mm in  
283 diameter subpleural consolidations may be present in healthy children in the first few years of life  
284 [20,46]. In children with CF however they have important clinical implications. Dense mucus is  
285 blocking the airways, including bronchiole, leading to focal atelectasis and hyperinflation, and  
286 resulting in recurrent infections. Peripheral mucus plugs are causing small foci of inflammation,  
287 that might progress into disease exacerbations [10]. There are several studies illustrating the fact,  
288 that structural changes seen in radiologic examinations may be seen ahead of pulmonary function  
289 deterioration [47]. In CF-USS subpleural consolidations were classified as: absent, few and multiple  
290 or extensive. In 75% of the studied patients subpleural consolidations were seen in LUS and in 17%  
291 the changes were multiple or wider than 10 mm. None of the changes smaller than 10 millimetres  
292 were seen in conventional radiograms. In our opinion subpleural consolidations, similarly to B-line  
293 artefacts cannot be evaluated without clinical data. Brody and colleagues reported, that in stable CF  
294 patients subpleural consolidations should be monitored, as they may lead to clinical deterioration  
295 and decline in pulmonary function test results [47]. In patients with bronchopulmonary disease  
296 exacerbations diagnosing and monitoring of subpleural consolidations with LUS may limit the  
297 number of x-rays performed and in consequence radiation exposure.

298 CF-USS also comprised the evaluation of pleural fluid which seems reasonable to perform  
299 in patients suspected of pleural complications regardless of conventional x-ray results. In the  
300 studied group in the 23% of patients we have documented the presence of fluid in the pleural space,  
301 majority of them having just the small amount in the costo – phrenical angle. Pleural irregularities  
302 were seen in only one of the studied patients. Caiulo and colleagues reported in their bronchiolitis  
303 study pleural irregularities in 25% of patients that have been disappearing in the course of follow up  
304 [40]. The reason for the disparity of our results might be the fact, that bronchiolitis is not present in  
305 all patients with cystic fibrosis.

306 In 9 patients we repeated LUS and conventional x-rays in stable condition in the course of 2  
307 years follow up. There were no statistically significant differences between either LUS or x-rays.  
308 Spearman rank correlation coefficient between x-ray and LUS was higher in the second series of  
309 studies.

310 We believe that LUS is an important diagnostic tool, accessory to conventional x-rays  
311 enabling monitoring of the disease process. We do acknowledge however the limitations of CF-USS  
312 scoring system. Our material is small and the study was conducted in a single CF centre – we do

hope however, that the study will be continued in the future. The most important limitation remains inability of visualisation of consolidations separated from pleura as well as of airway pathologies (bronchiectasis, mucus plugs) that constitute the mainstay of lung pathology in CF pulmonary disease. Nevertheless, due to its safety, non-invasiveness and availability we hope that CF-USS will find its place in long term monitoring of the disease, response to treatment and the risk of exacerbations

## Conclusions

1. LUS should be an accessory radiographic examination in the scheduled follow-up visits in cystic fibrosis paediatric patients, and CF-USS scoring system may provide clinicians with valuable informations concerning the disease progression and exacerbations' risk.
2. CF-USS results correlate with conventional x-ray modified Chrispin – Norman score.
3. LUS constitute an invaluable tool for the diagnosis of subpleural consolidations
4. LUS limitations remain inability to visualise consolidations separated from the pleura and larger airways. Numerous clinical conditions in which B-line artefacts can be present additionally makes it difficult to recommend LUS as the sole diagnostic modality in cystic fibrosis patients.

Authors have no conflict of interest

## References

1. Walkowiak J, Pogorzelski A, Sands D, Skorupa W, Milanowski A, Nowakowska A et al. Zasady rozpoznawania i leczenia mukowiscydozy Zalecenia Polskiego Towarzystwa Mukowiscydozy 2009 Poznań – Warszawa – Rzeszów. Stand Med. 2009;6:352–378. Polish
2. Cuthbert AW. New horizons in the treatment of cystic fibrosis. Br J Pharmacol. 2011;163:173–183.
3. Voter KZ, Ren CL. Diagnosis of cystic fibrosis. Clin Rev Allergy Immunol. 2008;35:100–106.
4. Conway SP, Pond MN, Bowler I, Smith DL, Simmonds EJ, Joanes DN, et al. The chest radiograph in cystic fibrosis: a new scoring system compared with the Chrispin-Norman and Brasfield scores. Thorax. 1994;49:860–862.

5. Vinay K, Cotran RS, Robbins SL. Robbin's Pathology. 1st ed. Wrocław: Urban & Partner; 2005. Polish
6. Pruszyński B, Leszczyński S. Diagnostyka obrazowa. Płuca i śródpiersie. 1st ed. Warszawa: Wydawnictwo Lekarskie PZWL; 2010. Polish
7. Brasfield D, Hicks G, Soong S, Peters J, Tiller R. Evaluation of scoring system of the chest radiograph in cystic fibrosis: a collaborative study. *AJR Am J Roentgenol*. 1980;134:1195–1198.
8. Chrispin AR, Norman AP. The systematic evaluation of the chest radiograph in cystic fibrosis. *Pediatr Radiol*. 1974;2:101–105.
9. Benden C, Wallis C, Owens CM, Ridout DA, Dinwiddie R. The Chrispin-Norman score in cystic fibrosis: doing away with the lateral view. *Eur Respir J*. 2005;26:894–897.
10. Iwanowska B. New method of scoring lung changes using computed tomography in patients with cystic fibrosis. *Med Wieku Rozwoj*. 2012;16:290–302. Polish
11. Weatherly MR, Palmer CG, Peters ME, Green CG, Fryback D, Langhough R, et al. Wisconsin cystic fibrosis chest radiograph scoring system. *Pediatrics*. 1993;91:488–495.
12. Brasfield D, Hicks G, Soong S, Tiller RE. The chest roentgenogram in cystic fibrosis: a new scoring system. *Pediatrics*. 1979;63:24–29.
13. Sawyer SM, Carlin JB, DeCampo M, Bowes G. Critical evaluation of three chest radiograph scores in cystic fibrosis. *Thorax*. 1994;49:863–866.
14. Terheggen-Lagro S, Truijens N, van Poppel N, Gulmans V, van der Laag J, van der Ent C. Correlation of six different cystic fibrosis chest radiograph scoring systems with clinical parameters. *Pediatr Pulmonol*. 2003;35:441–445.
15. Helbich TH, Heinz-Peer G, Eichler I, Wunderbaldinger P, Götz M, Wojnarowski C, et al. Cystic Fibrosis: CT Assessment of Lung Involvement in Children and Adults. *Radiology*. 1999;213:537–544.
16. Devakonda A, Raoof S, Sung A, Travis WD, Naidich D. Bronchiolar disorders: a clinical-radiological diagnostic algorithm. *Chest*. 2010;137:938–951.
17. Brody AS, Sucharew H, Campbell JD, Millard SP, Molina PL, Klein JS, et al. Computed tomography correlates with pulmonary exacerbations in children with cystic fibrosis. *Am J Respir Crit Care Med*. 2005;172:1128–1132.
18. Bhalla M, Turcios N, Aponte V, Jenkins M, Leitman BS, McCauley DI, et al. Cystic fibrosis: scoring system with thin-section CT. *Radiology*. 1991;179:783–788.

19. Pearce MS, Salotti JA, Little MP, McHugh K, Lee C, Kim KP, et al. Radiation exposure from CT scans in childhood and subsequent risk of leukaemia and brain tumours: a retrospective cohort study. *Lancet Lond Engl*. 2012;380:499–505.
20. Tomà P, Owens CM. Chest ultrasound in children: critical appraisal. *Pediatr Radiol*. 2013;43:1427-1434.
21. Kosiak W. Diagnostyka ultrasonograficzna chorób zapalnych płuc. Część 1. Obraz prawidłowy i podstawy diagnostyki ultrasonograficznej zmian zapalnych w płucach. *Ultrasonografia*. 2009;9:26–31. Polish
22. Ciuca IM, Pop LL. Lung ultrasound in CF children's exacerbation – one center experience. *J Cyst Fibros*. 2015;14:S95.
23. Ciuca I, Pop L, Marc M, Oancea C. How useful is the lung ultrasound in cystic fibrosis? *Eur Respir J*. 2016;48(suppl 60):PA1261.
24. Lichtenstein DA. Lung ultrasound in the critically ill. *Ann Intensive Care*. 2014;4:1.
25. Barillari A, Fioretti M. Lung ultrasound: a new tool for the emergency physician. *Intern Emerg Med*. 2010;5:335–340.
26. Copetti R, Cattarossi L. Ultrasound diagnosis of pneumonia in children. *Radiol Med (Torino)*. 2008;113:190–198.
27. Mathis G. Thorax sonography-Part I: Chest wall and pleura. *Ultrasound Med Biol*. 1997;23:1131–1139.
28. Kosiak W. Ultrasonograf stetoskopem w anestezjologii i medycynie ratunkowej: mit czy rzeczywistość? Część 1. Obraz prawidłowy i podstawy diagnostyki ultrasonograficznej płuc. *Anestezjol Ratow*. 2010;4:99–110. Polish
29. Lichtenstein DA. Ultrasound in the management of thoracic disease. *Crit Care Med*. 2007;35(5 Suppl):S250-261.
30. Lichtenstein DA, Menu Y. A bedside ultrasound sign ruling out pneumothorax in the critically ill. Lung sliding. *Chest*. 1995;108:1345–1348.
31. Lichtenstein DA, Mauriat P. Lung Ultrasound in the Critically Ill Neonate. *Curr Pediatr Rev*. 2012;8:217–23.
32. Lichtenstein DA, Mezière GA. Relevance of lung ultrasound in the diagnosis of acute respiratory failure: the BLUE protocol. *Chest*. 2008;134:117–125.
33. Lichtenstein D, Goldstein I, Mourgeon E, Cluzel P, Grenier P, Rouby J-J. Comparative diagnostic performances of auscultation, chest radiography, and lung ultrasonography in acute respiratory distress syndrome. *Anesthesiology*. 2004;100:9–15.



34. Lichtenstein D, Mézière G, Biderman P, Gepner A, Barré O. The comet-tail artifact. An ultrasound sign of alveolar-interstitial syndrome. *Am J Respir Crit Care Med*. 1997;156:1640–1646.
35. Gargani L, Volpicelli G. How I do it: lung ultrasound. *Cardiovasc Ultrasound*. 2014;12:25.
36. Baldi G, Gargani L, Abramo A, D’Errico L, Caramella D, Picano E, et al. Lung water assessment by lung ultrasonography in intensive care: a pilot study. *Intensive Care Med*. 2013;39:74–84.
37. Soldati G, Copetti R, Sher S. Sonographic interstitial syndrome: the sound of lung water. *J Ultrasound Med Off J Am Inst Ultrasound Med*. 2009;28:163–174.
38. Kosiak W. Ultrasonograf stetoskopem w anestezjologii i medycynie ratunkowej: mit czy rzeczywistość? Część 2. Możliwości wykorzystania przezklatkowego badania ultrasonograficznego płuc w diagnostyce odmy opłucnowej, obrzęku płuc, zatorowości płucnej i chorób zapalnych płuc w medycynie ratunkowej. *Anestezjol Ratow*. 2010;4:361–372. Polish
39. Caiulo VA, Gargani L, Caiulo S, Fisicaro A, Moramarco F, Latini G, et al. Lung ultrasound characteristics of community-acquired pneumonia in hospitalized children. *Pediatr Pulmonol*. 2013;48:280–287.
40. Caiulo VA, Gargani L, Caiulo S, Fisicaro A, Moramarco F, Latini G, et al. Lung ultrasound in bronchiolitis: comparison with chest X-ray. *Eur J Pediatr*. 2011;170:1427–1433.
41. Lai HJ, Cheng Y, Farrell PM. The survival advantage of patients with cystic fibrosis diagnosed through neonatal screening: evidence from the United States Cystic Fibrosis Foundation registry data. *J Pediatr*. 2005;147(3 Suppl):S57-63.
42. Prokop M, Galanski M. *Spiralna i wielorzędowa tomografia komputerowa człowieka*. 2nd ed. Warszawa: Medipage; 2010. Polish
43. Dietrich CF, Mathis G, Blaivas M, Volpicelli G, Seibel A, Wastl D, et al. Lung B-line artefacts and their use. *J Thorac Dis*. 2016;8:1356–1365.
44. Chiesa AM, Ciccarese F, Gardelli G, Regina UM, Feletti F, Bacchi Reggiani ML, Zompatori M. Sonography of the normal lung: Comparison between young and elderly subjects. *J Clin Ultrasound*. 2014;43:230-234
45. Jończyk-Potoczna K. *Diagnostyka obrazowa układu oddechowego u dzieci chorych na mukowiscydozę*. Poznań: Wydawnictwo Naukowe Uniwersytetu Medycznego im. K. Marcinkowskiego w Poznaniu; 2017. Polish
46. Riccabona M. Ultrasound of the chest in children (mediastinum excluded). *Eur Radiol*. 2008;18:390–399.



47. Brody AS, Tiddens HAWM, Castile RG, Coxson HO, de Jong PA, Goldin J, et al. Computed tomography in the evaluation of cystic fibrosis lung disease. *Am J Respir Crit Care Med*. 2005;172:1246–1252.

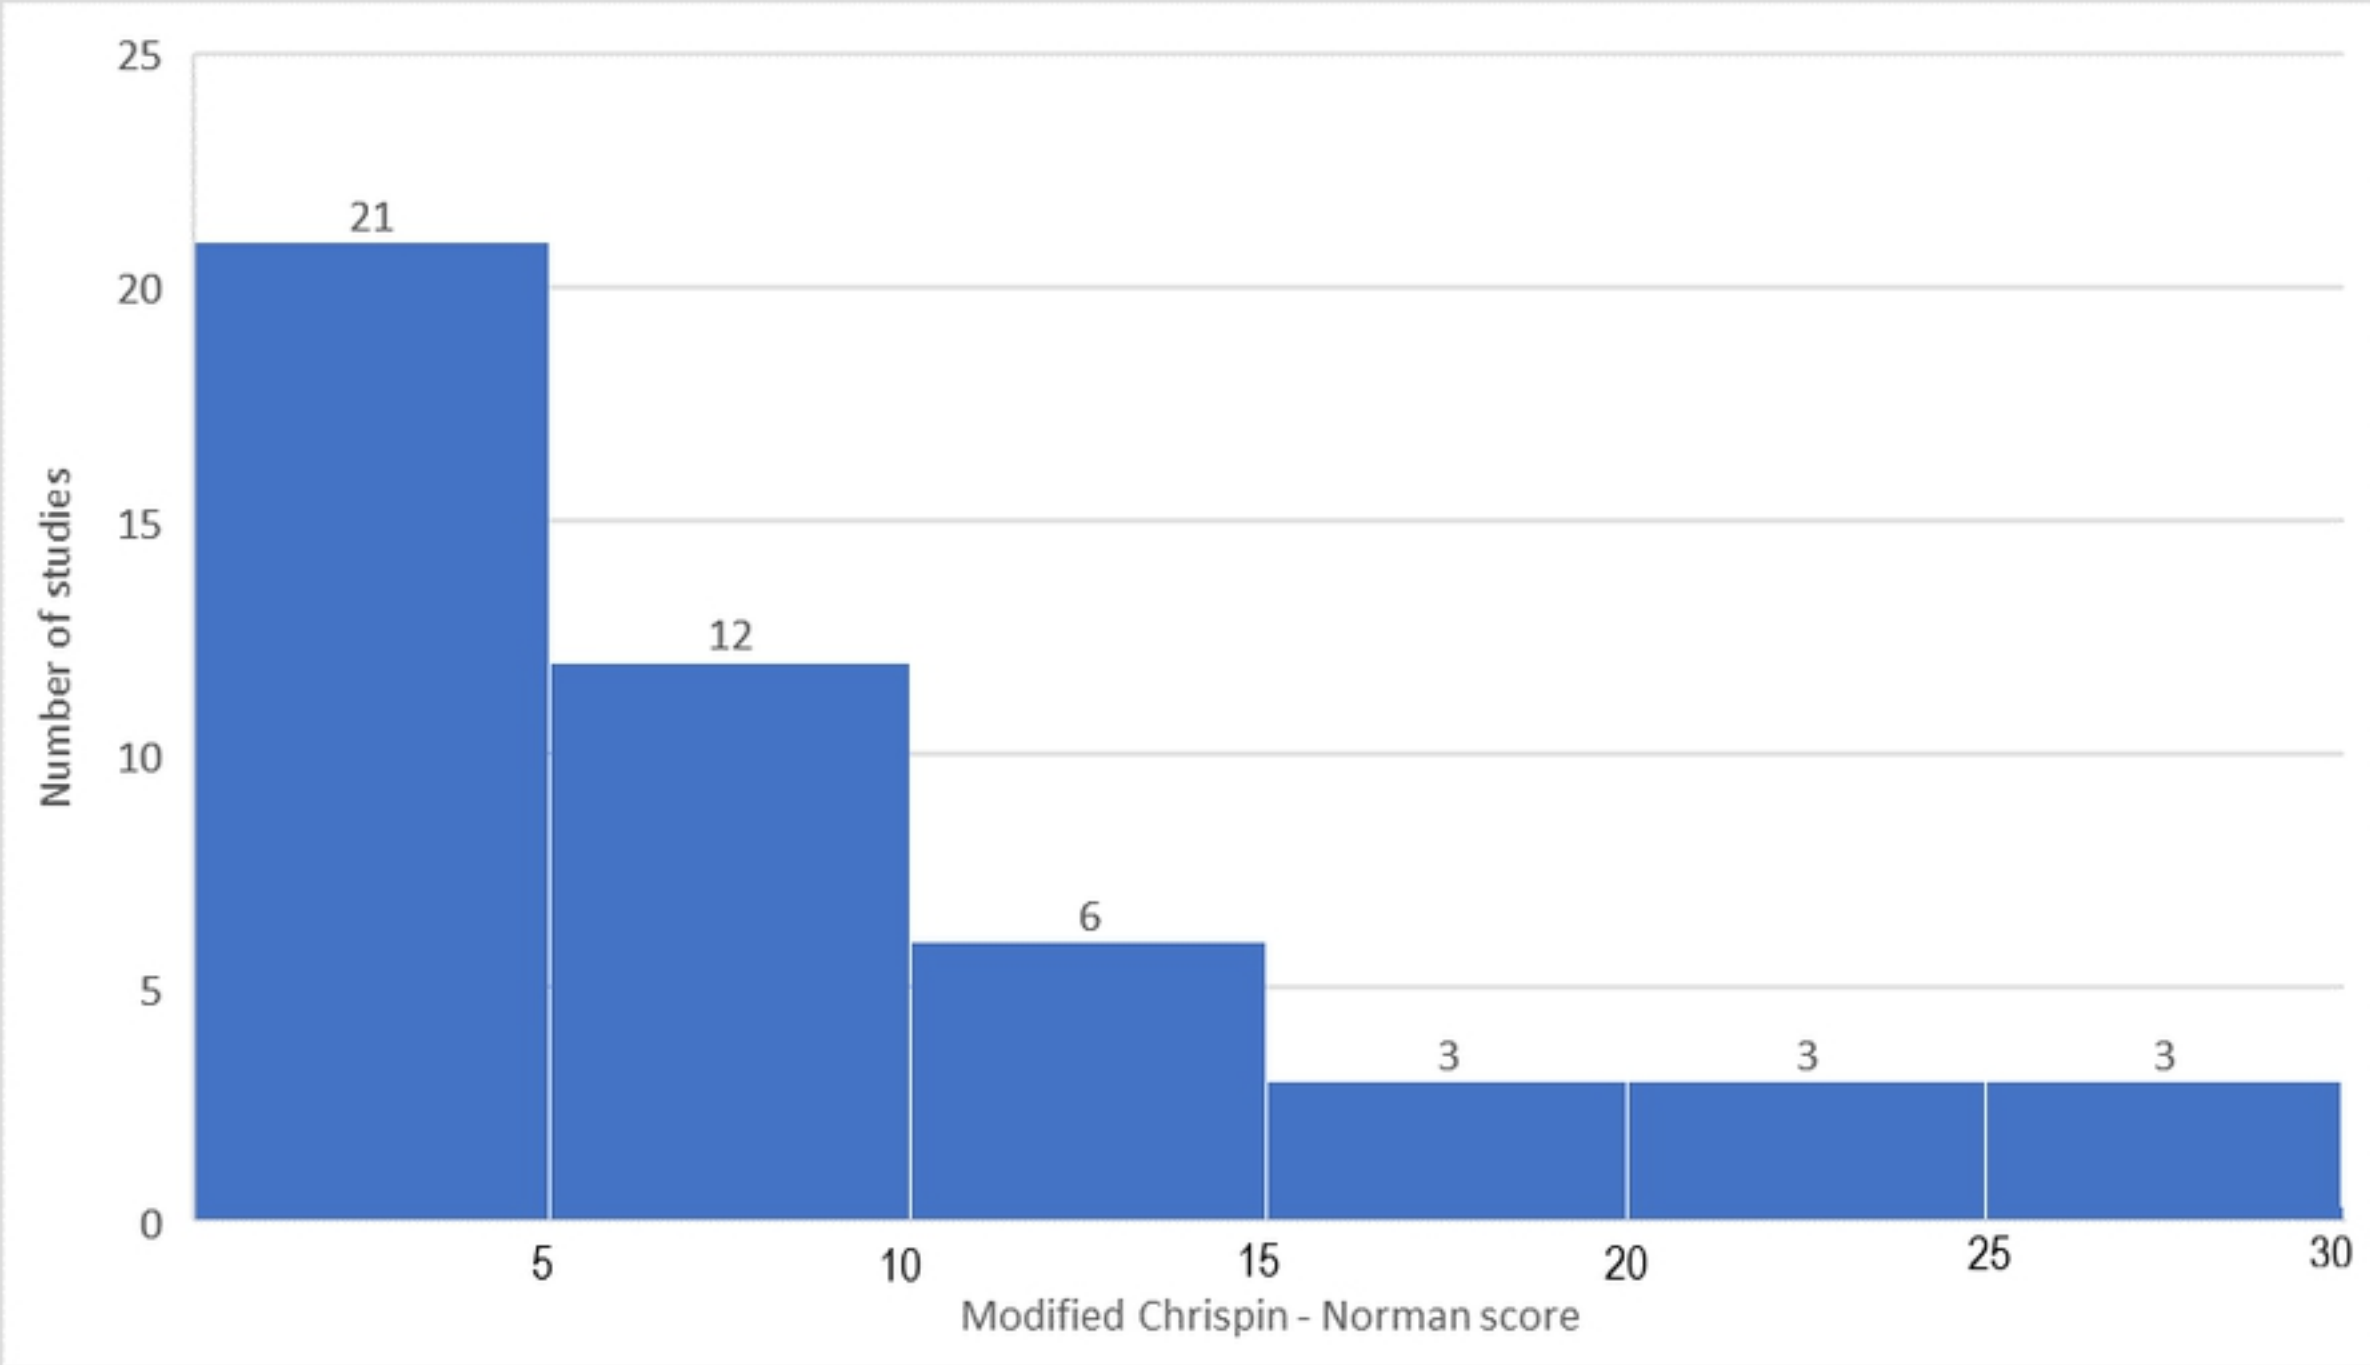

Figure

Number of studies

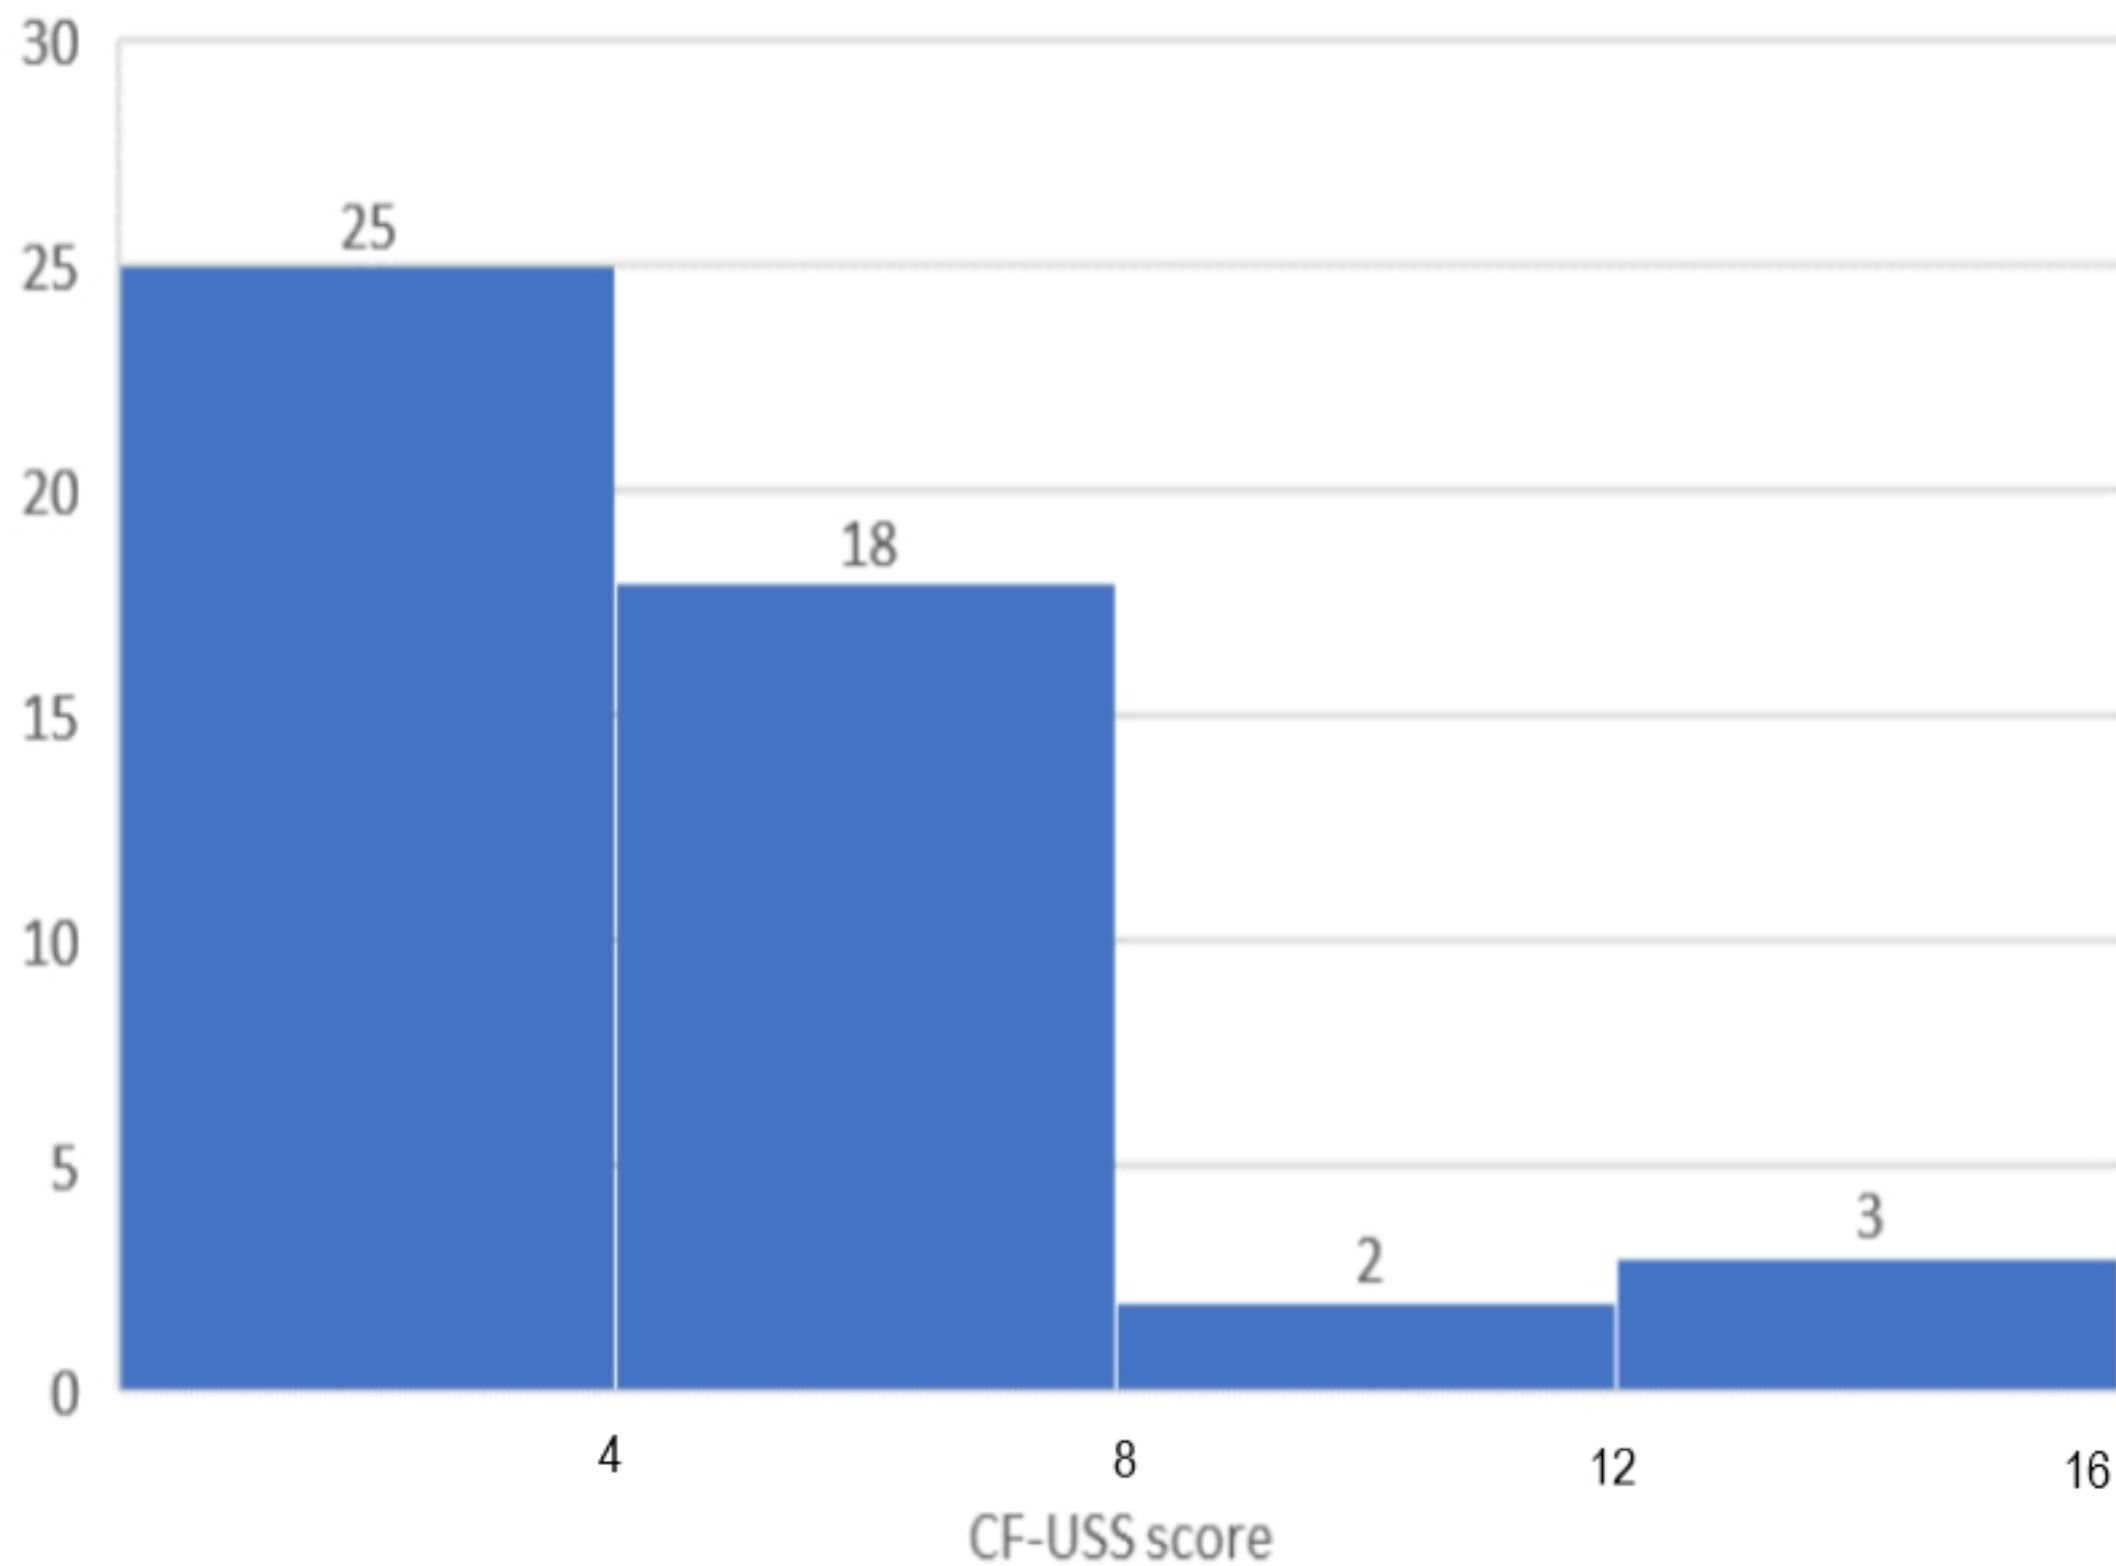

Figure

CF-USS

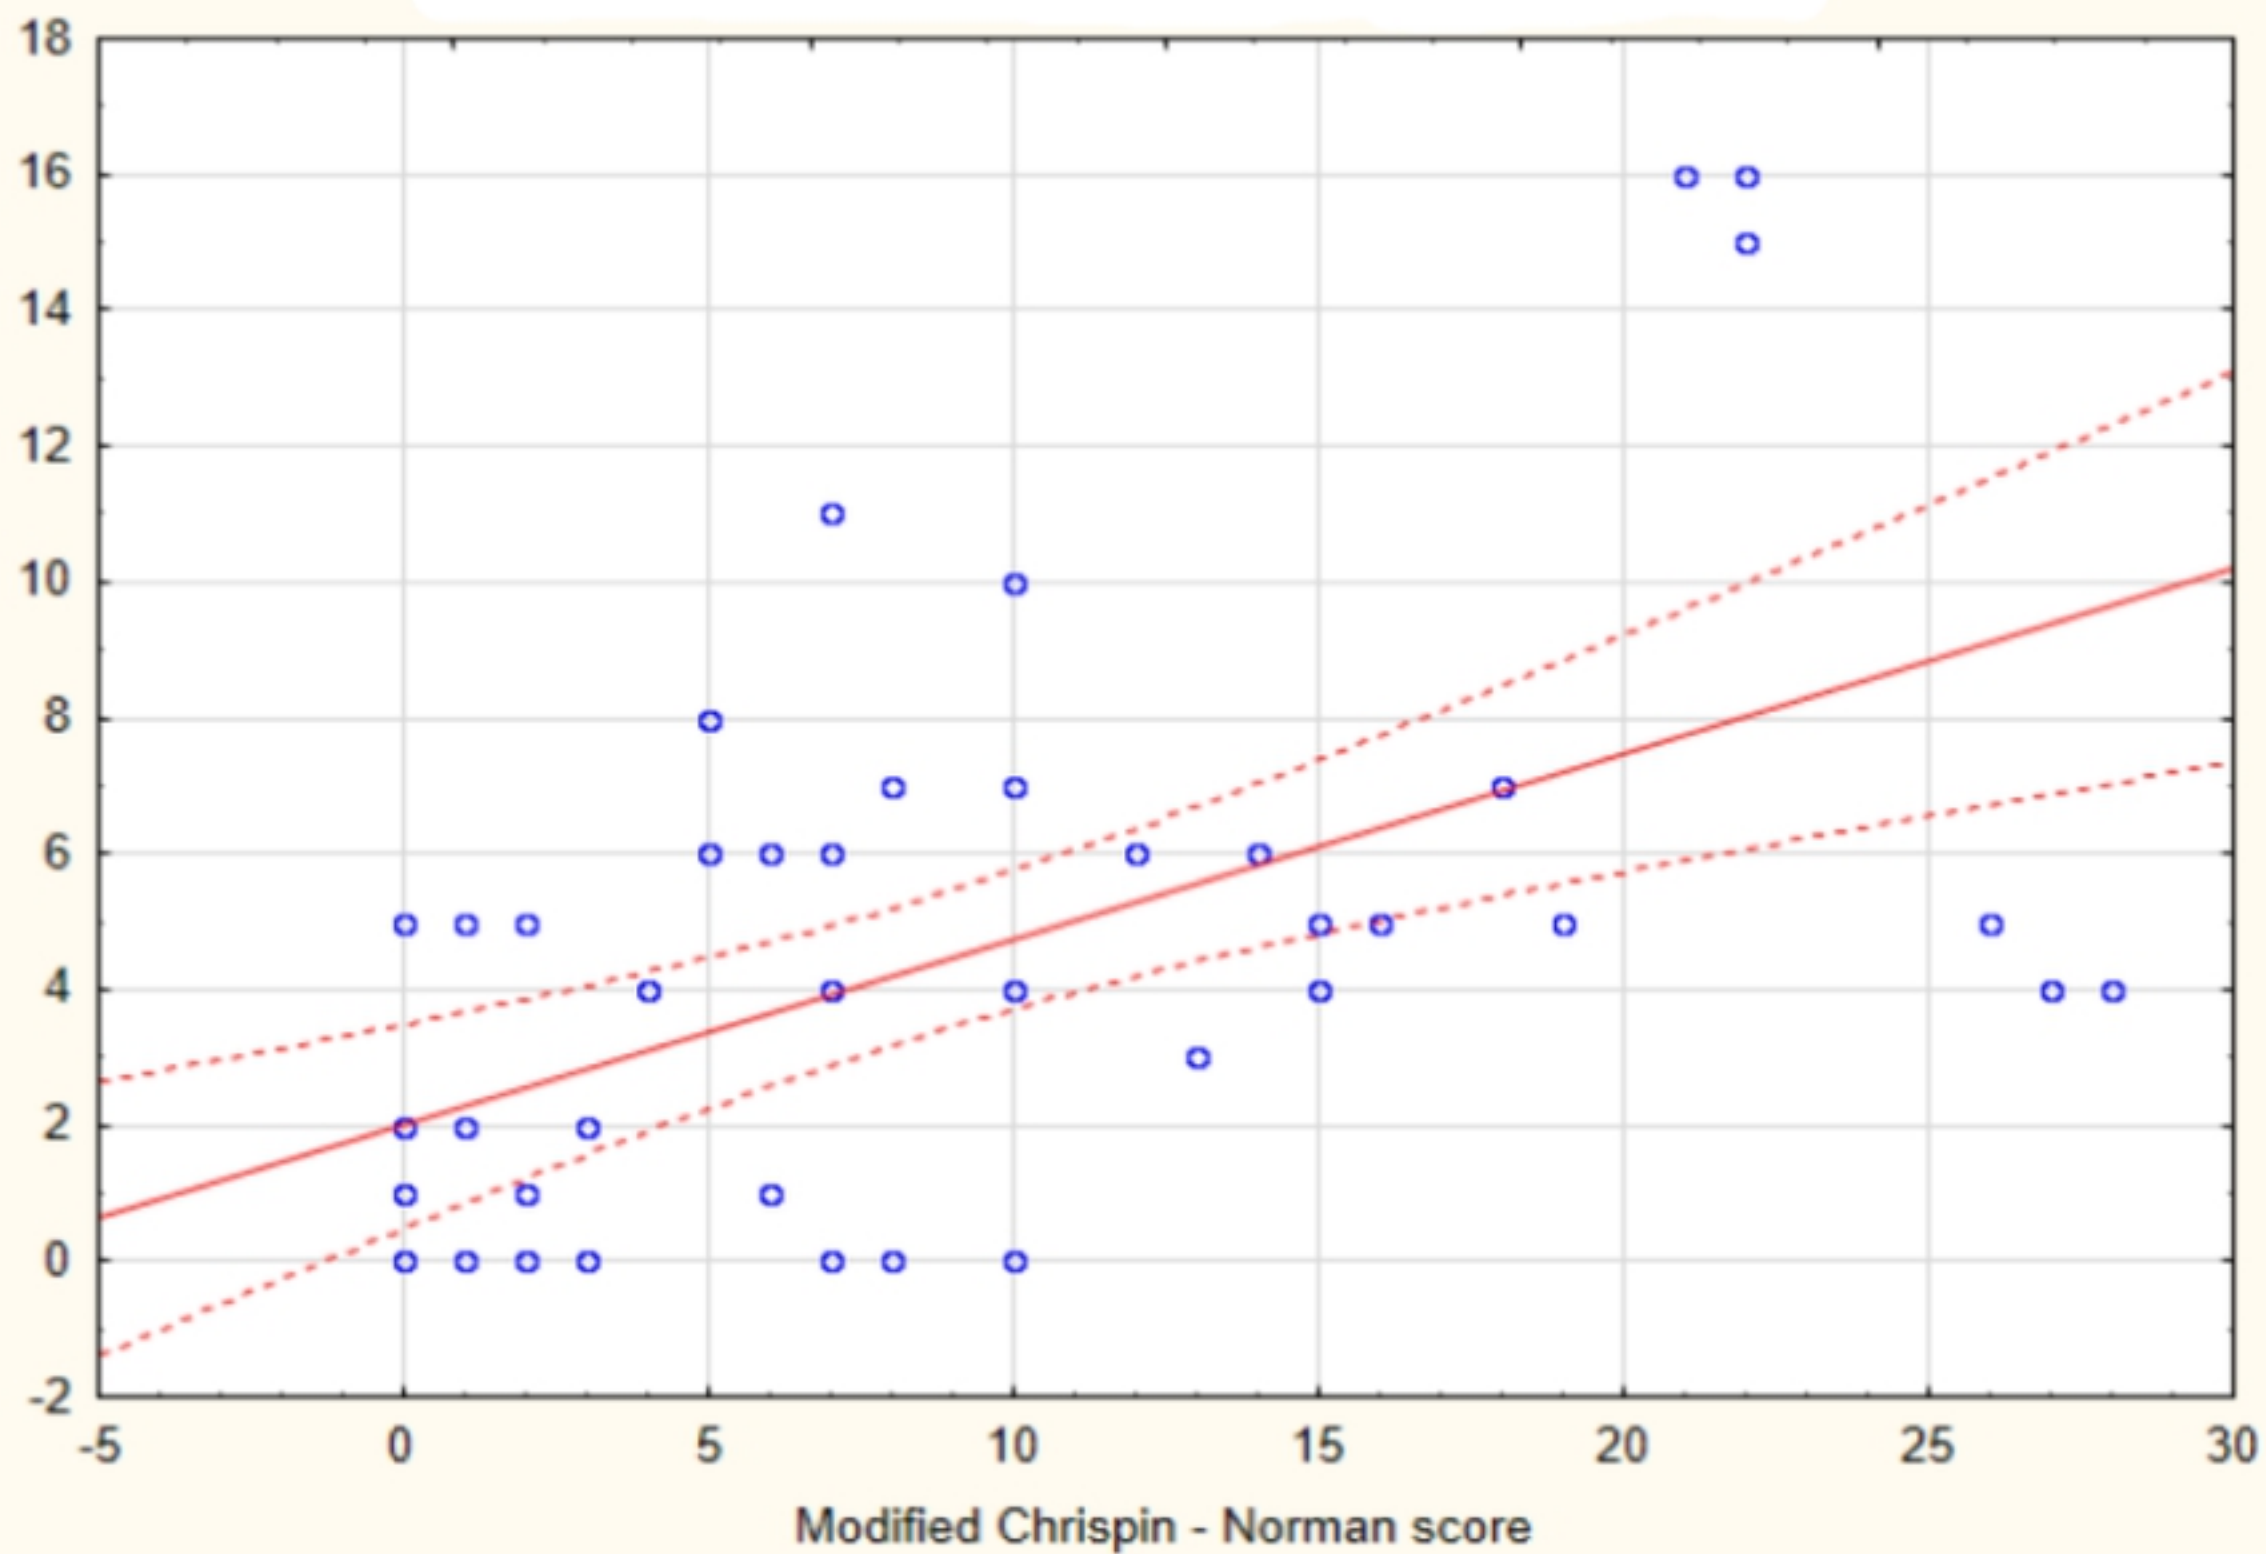

Figure

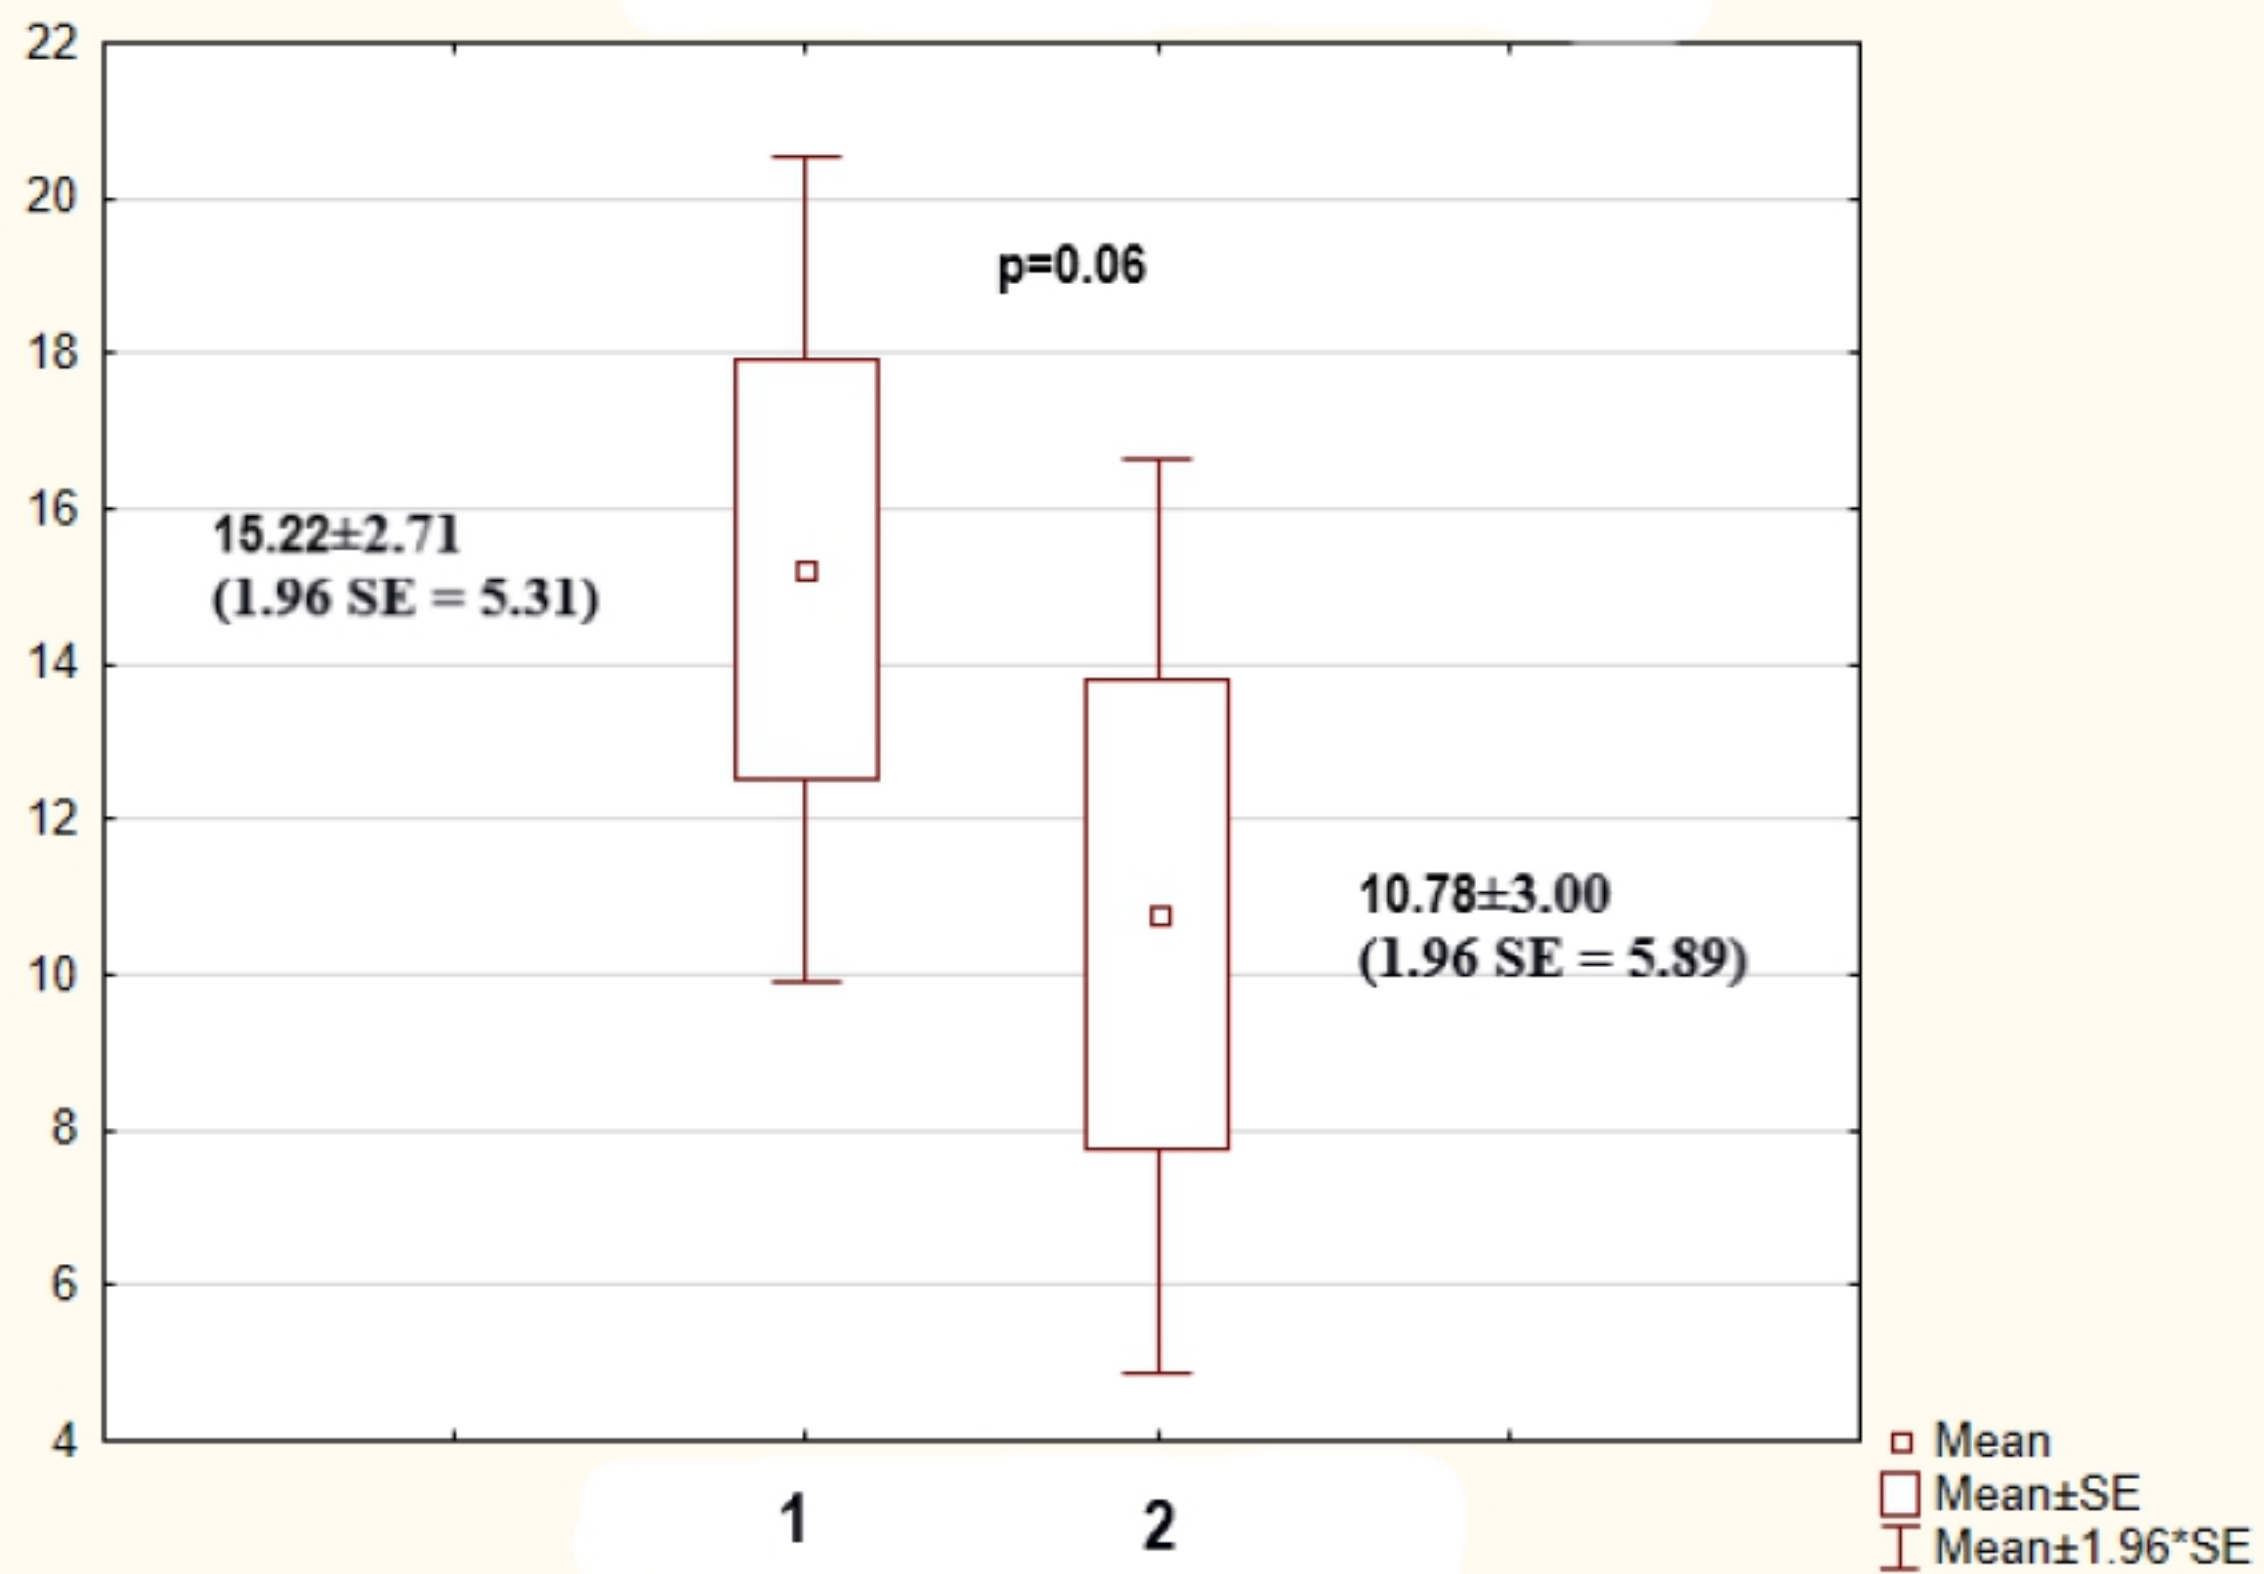

Figure

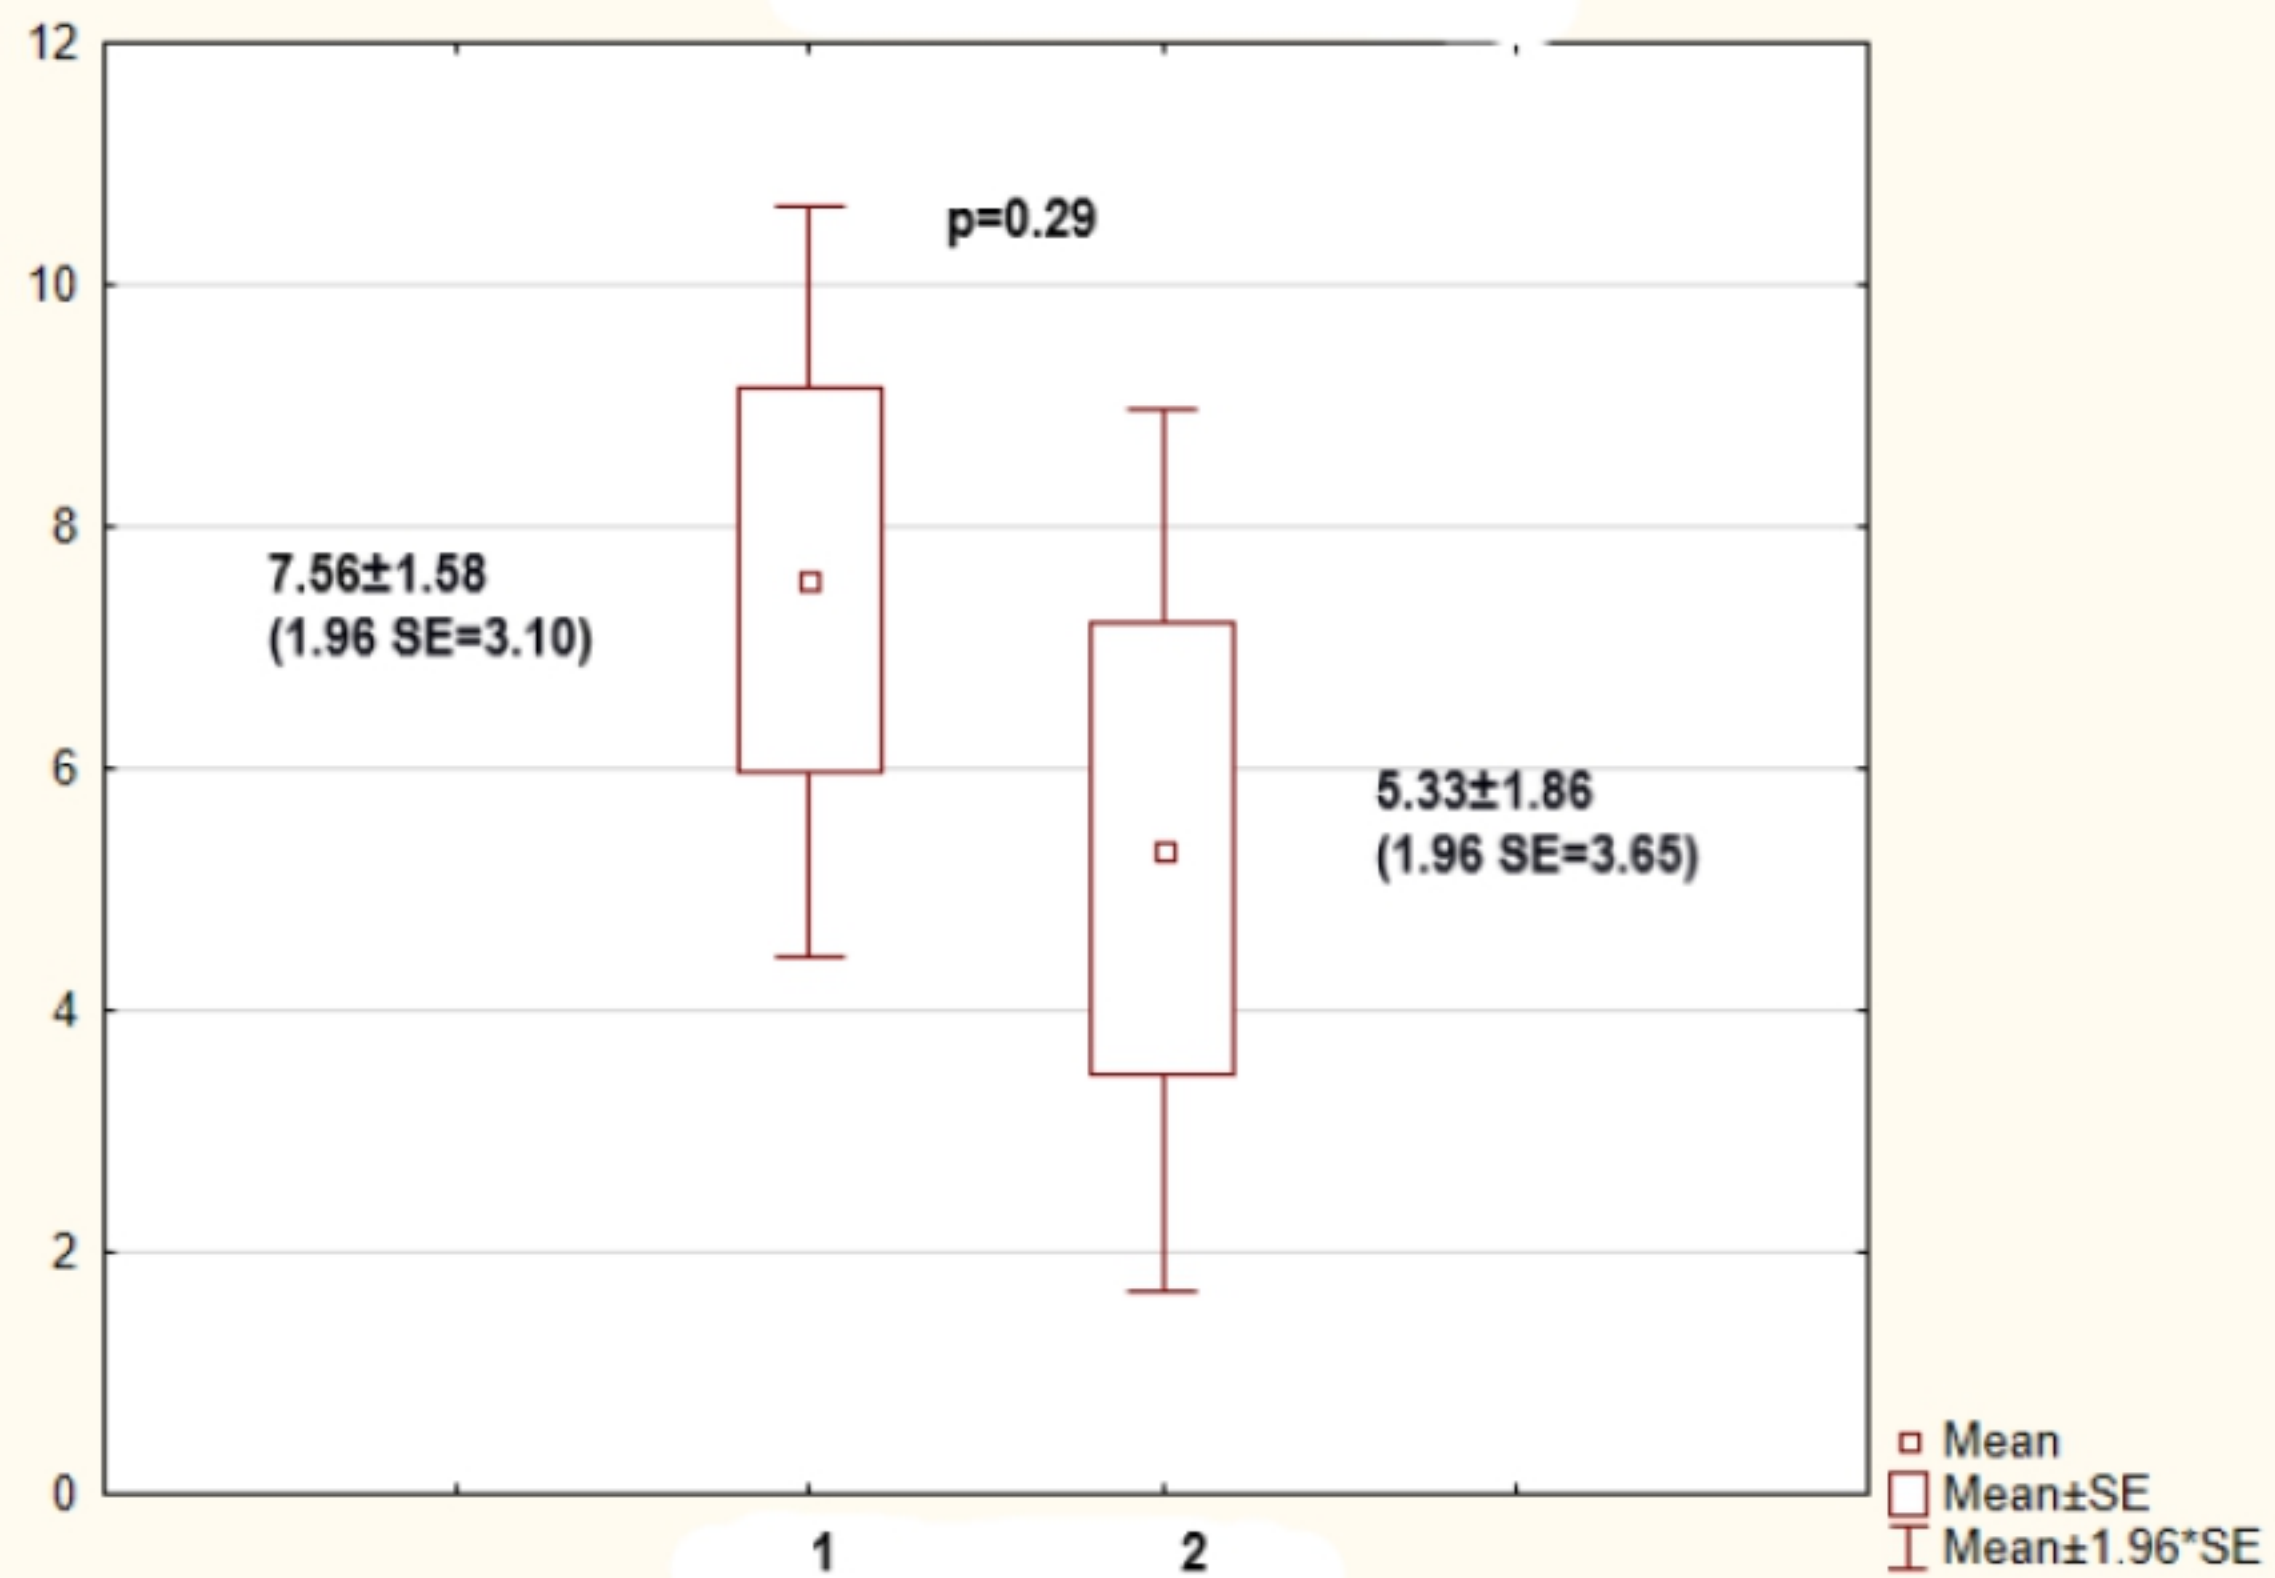

Figure

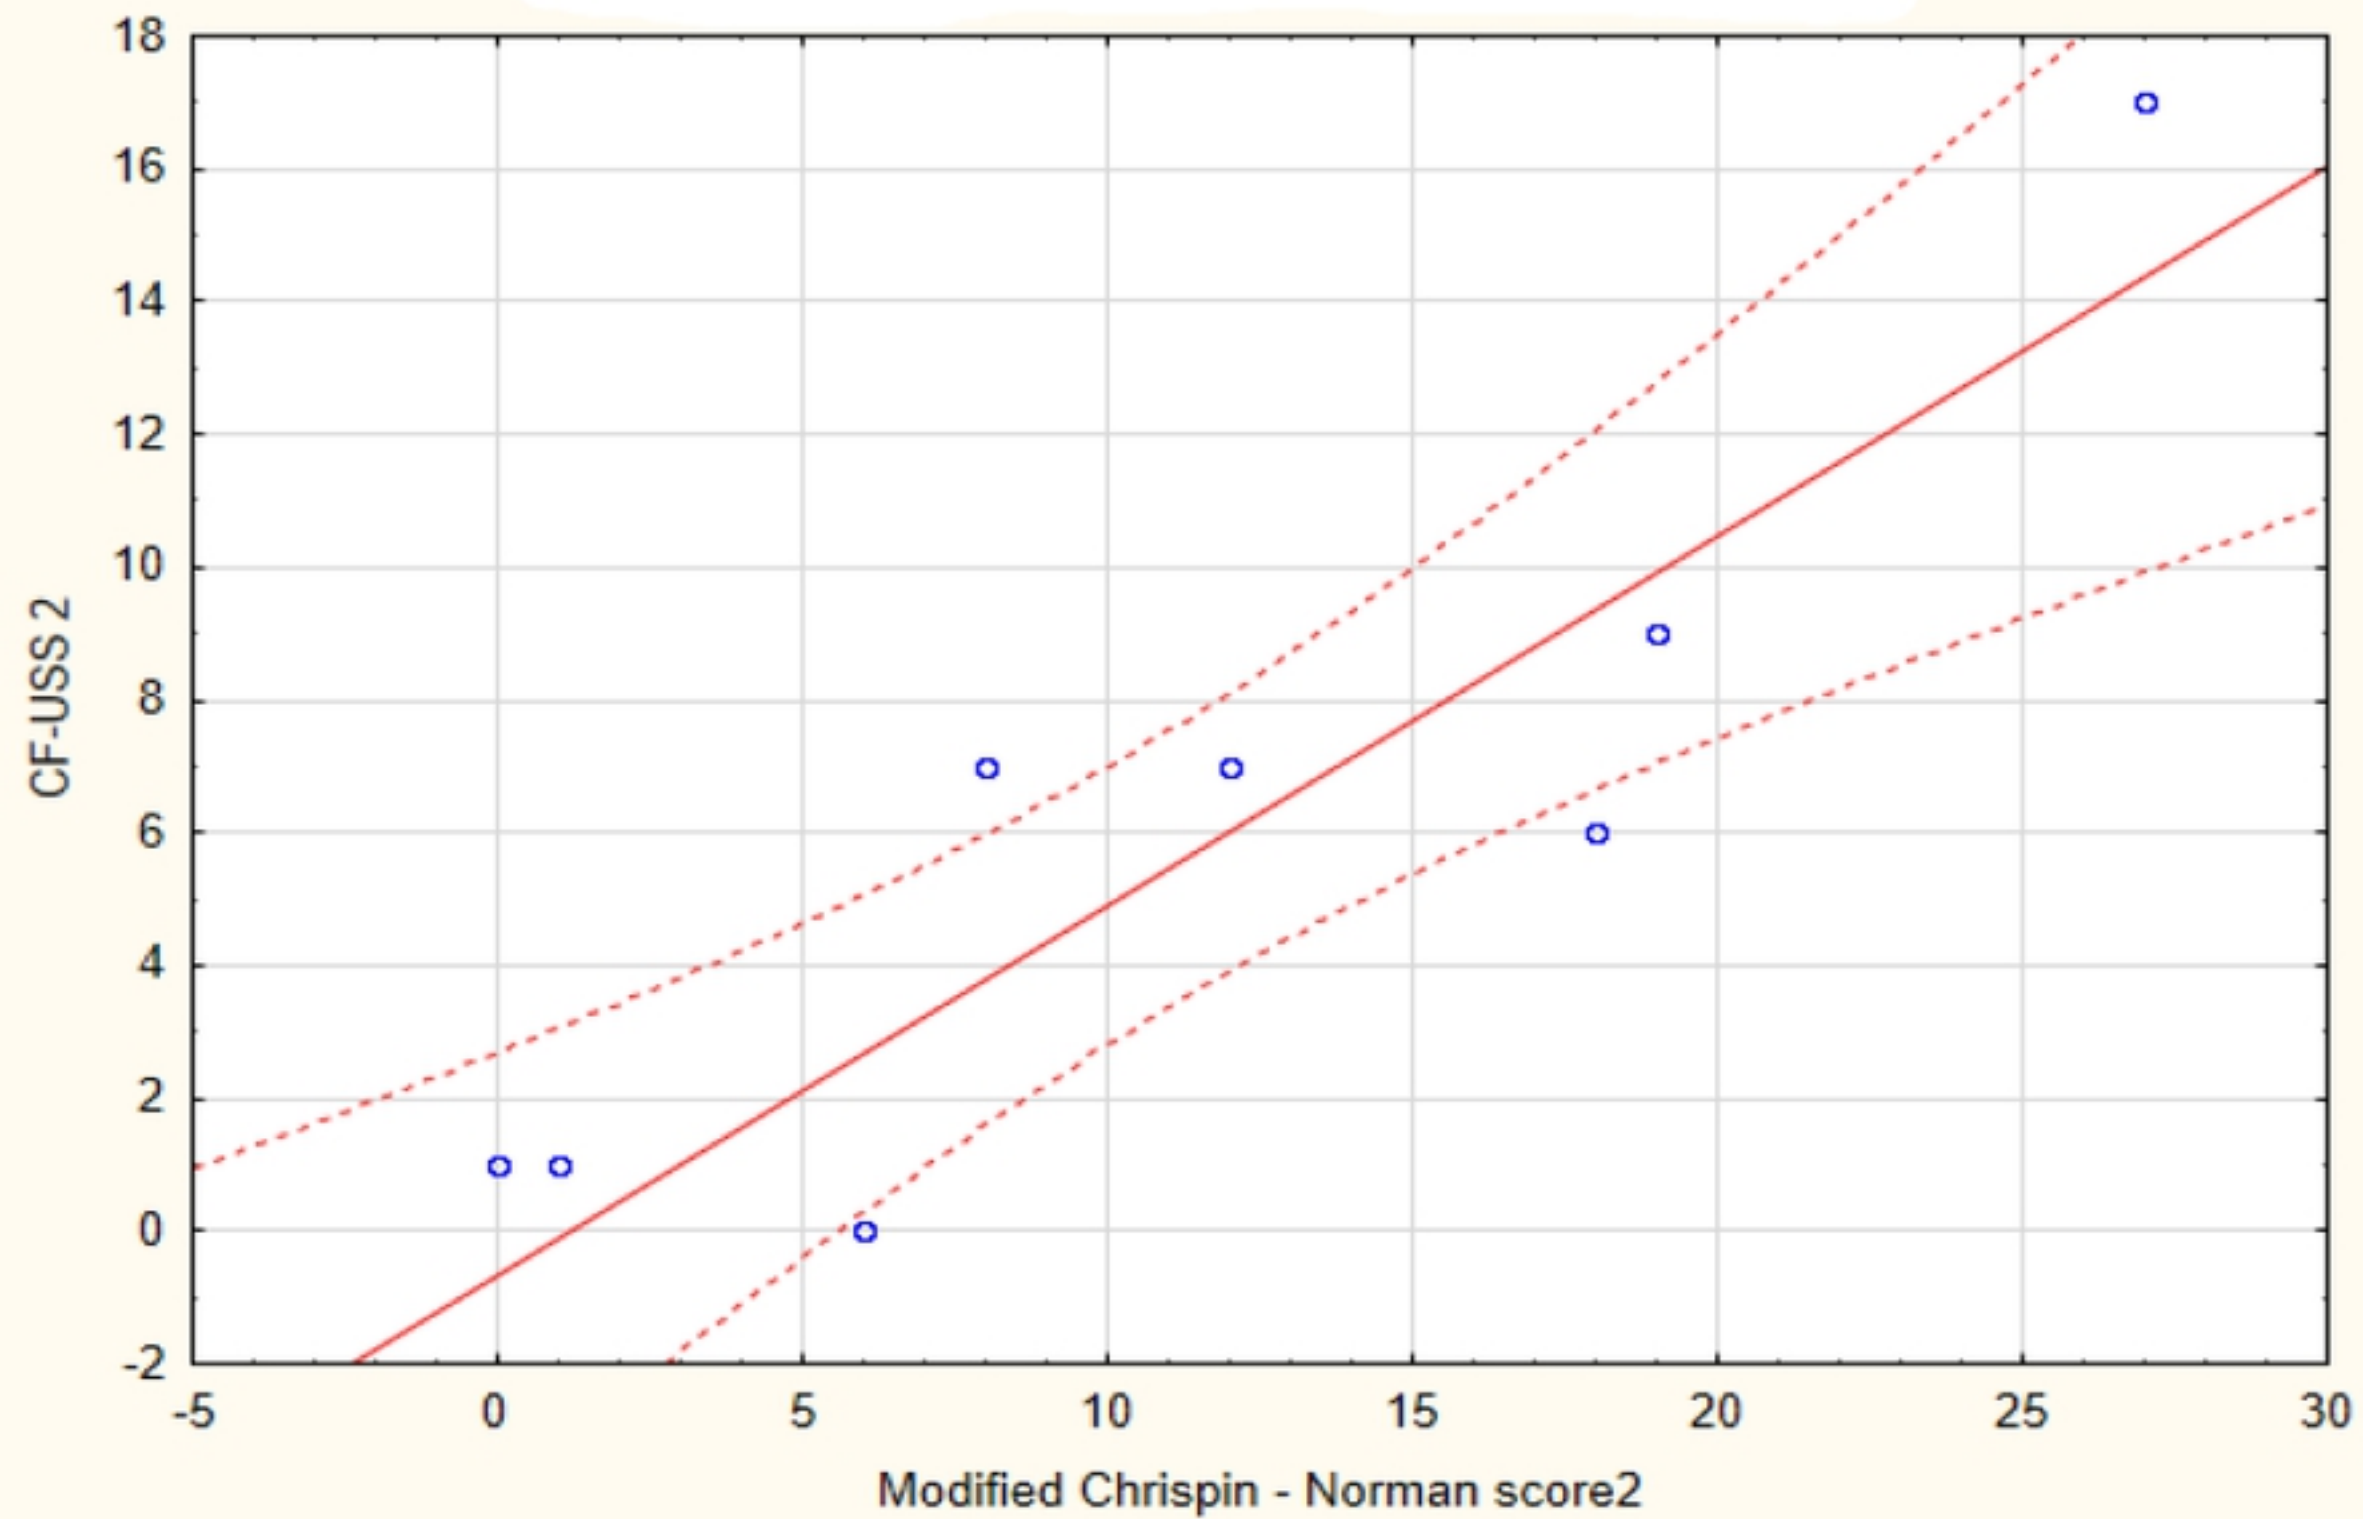

Figure

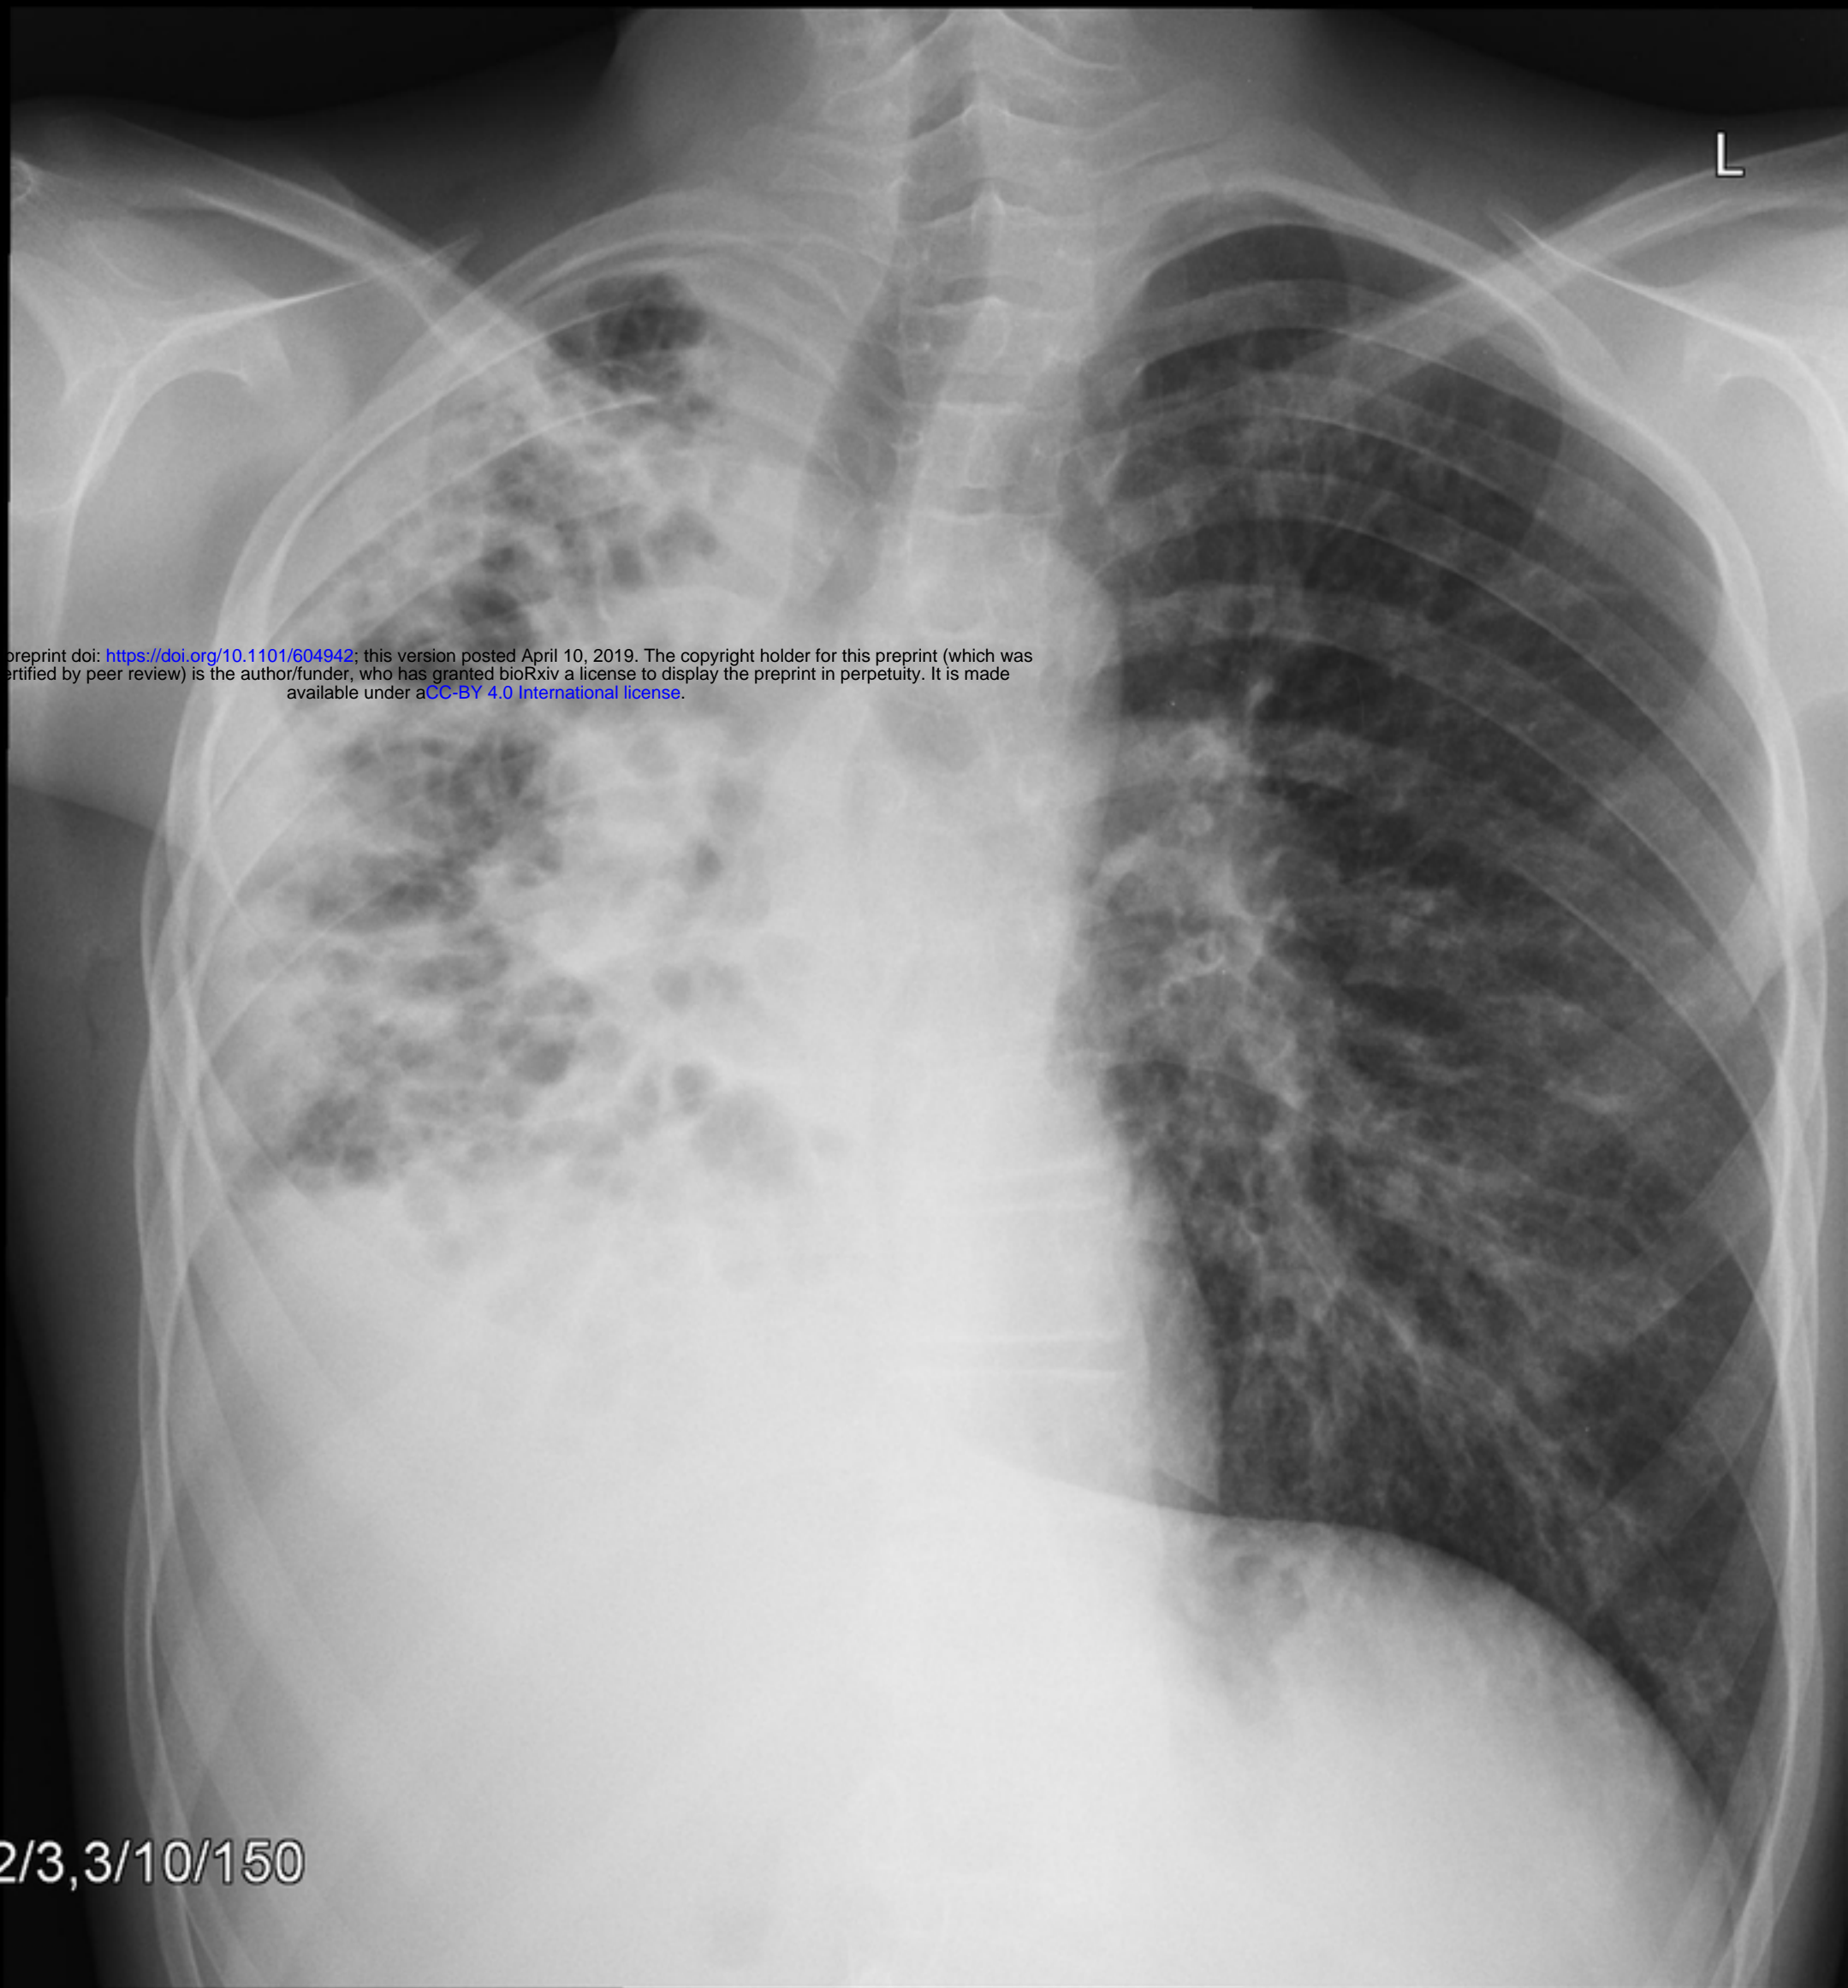

Figure



P

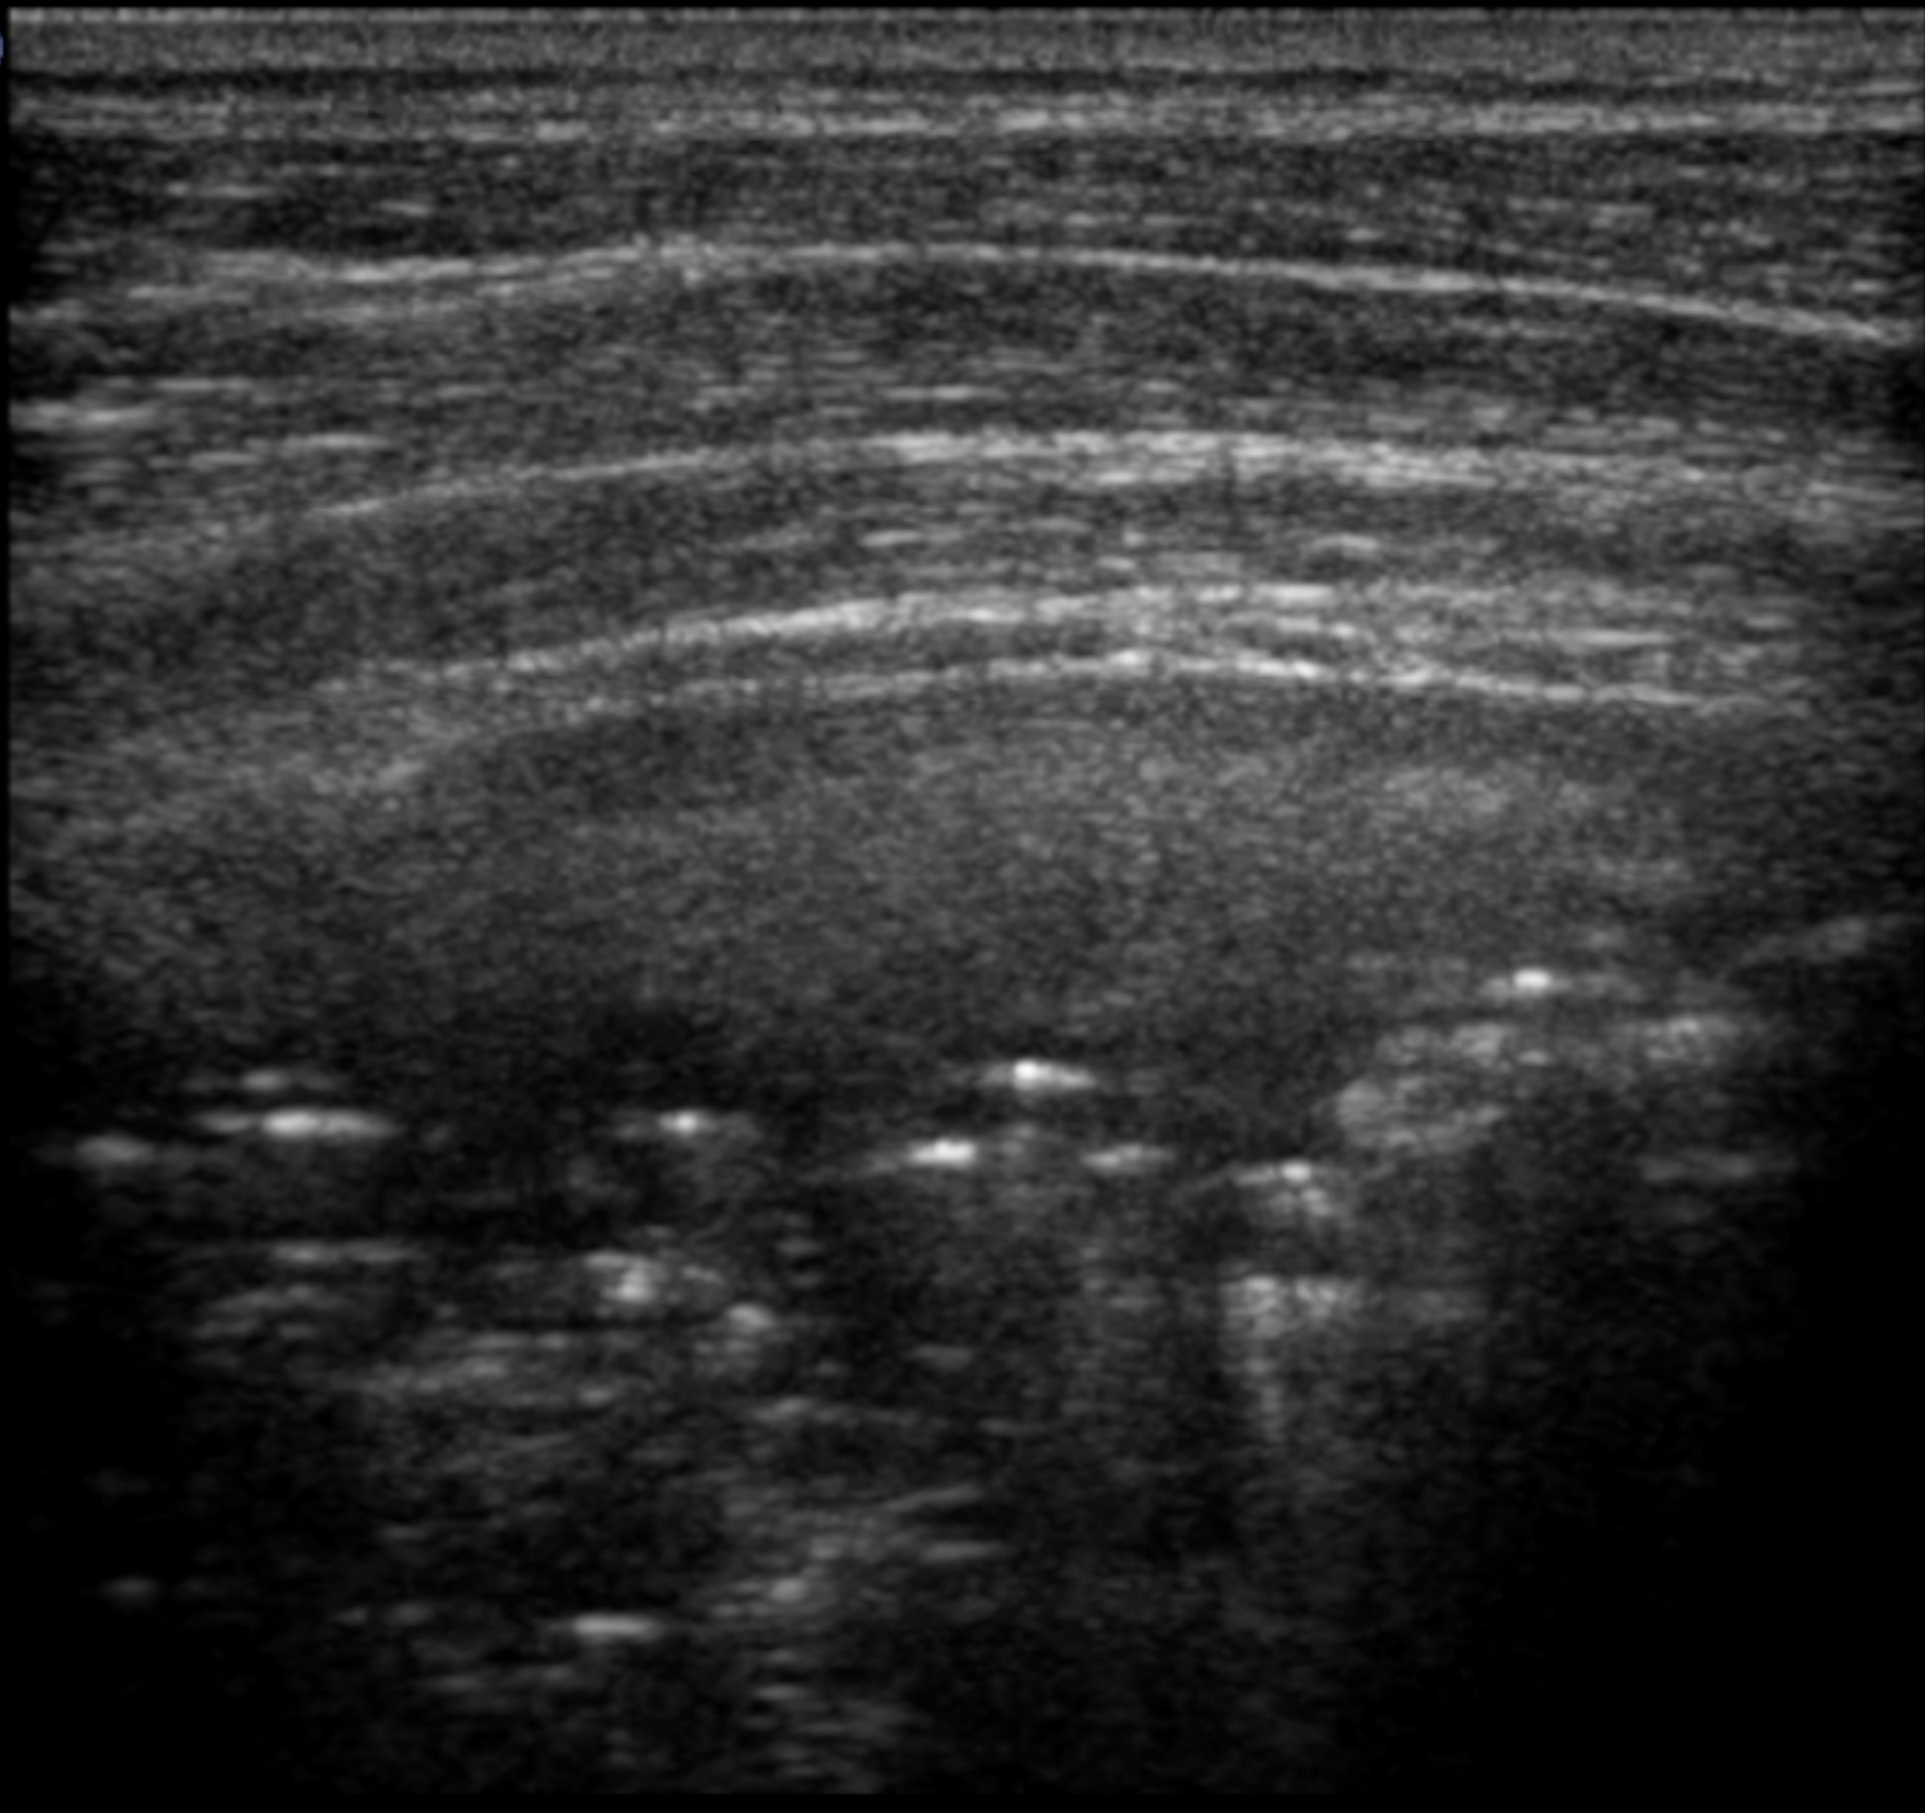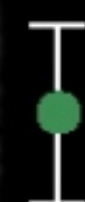

5.0

Figure

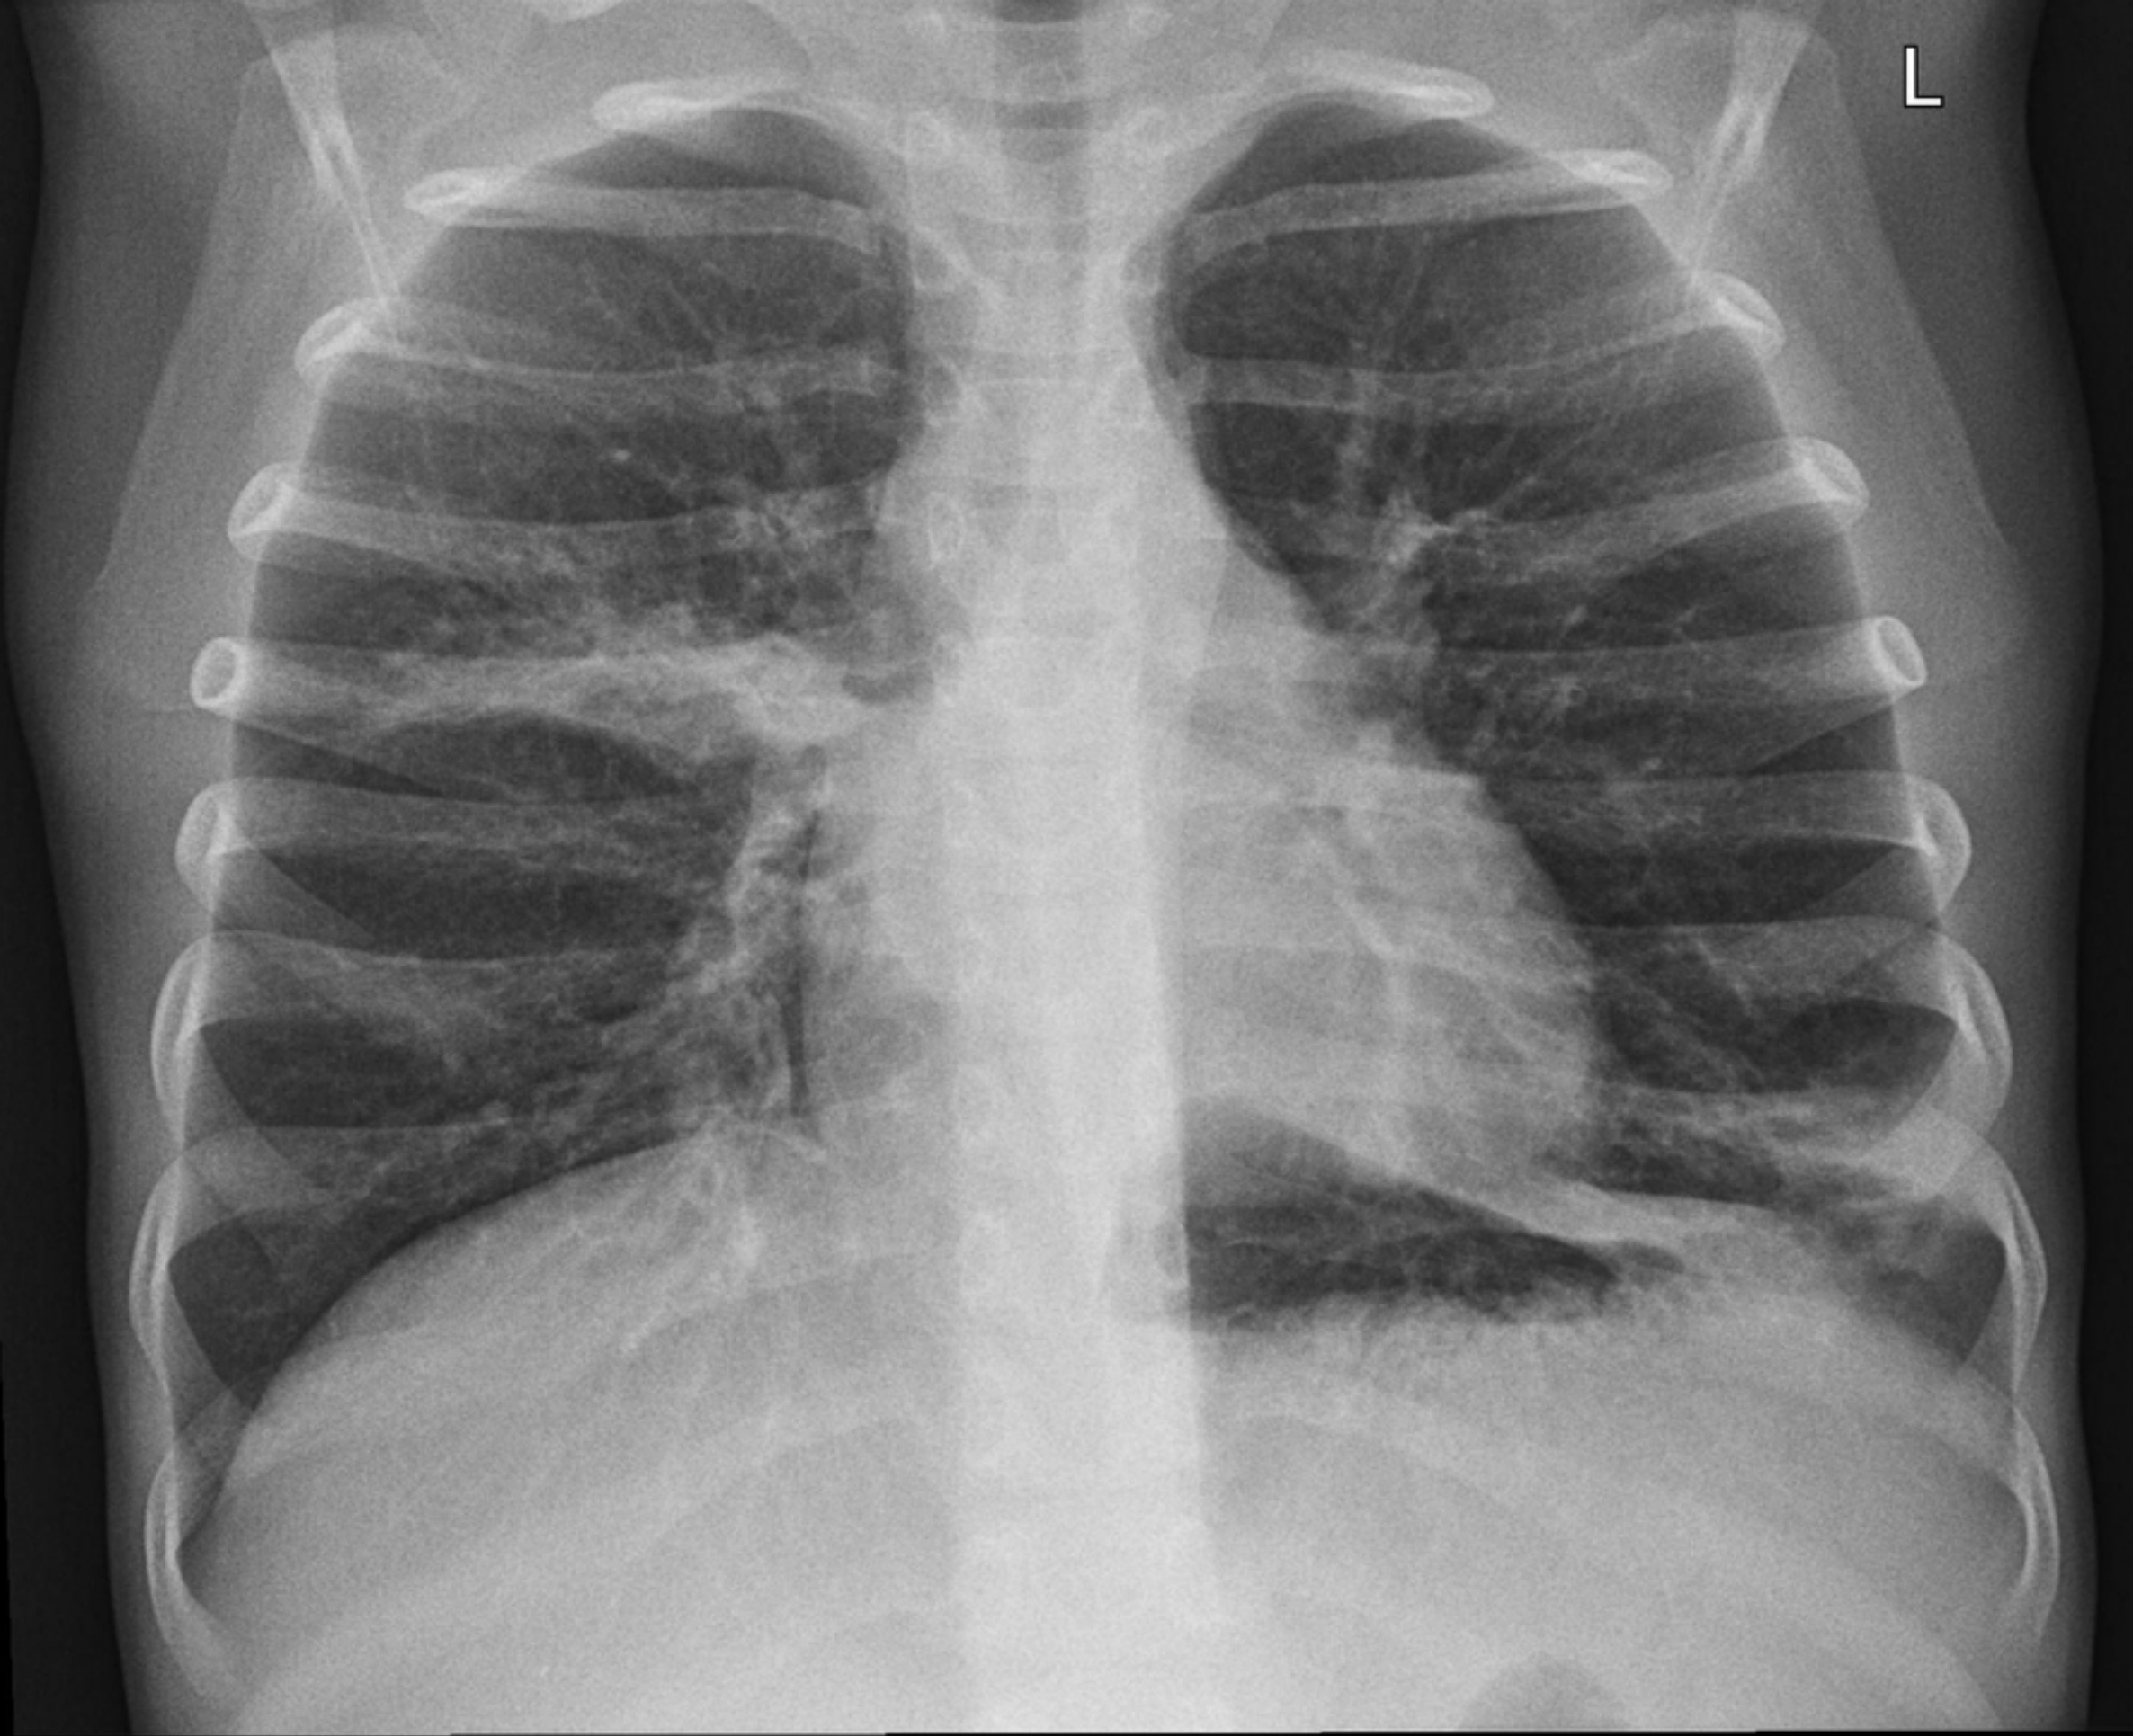

Figure

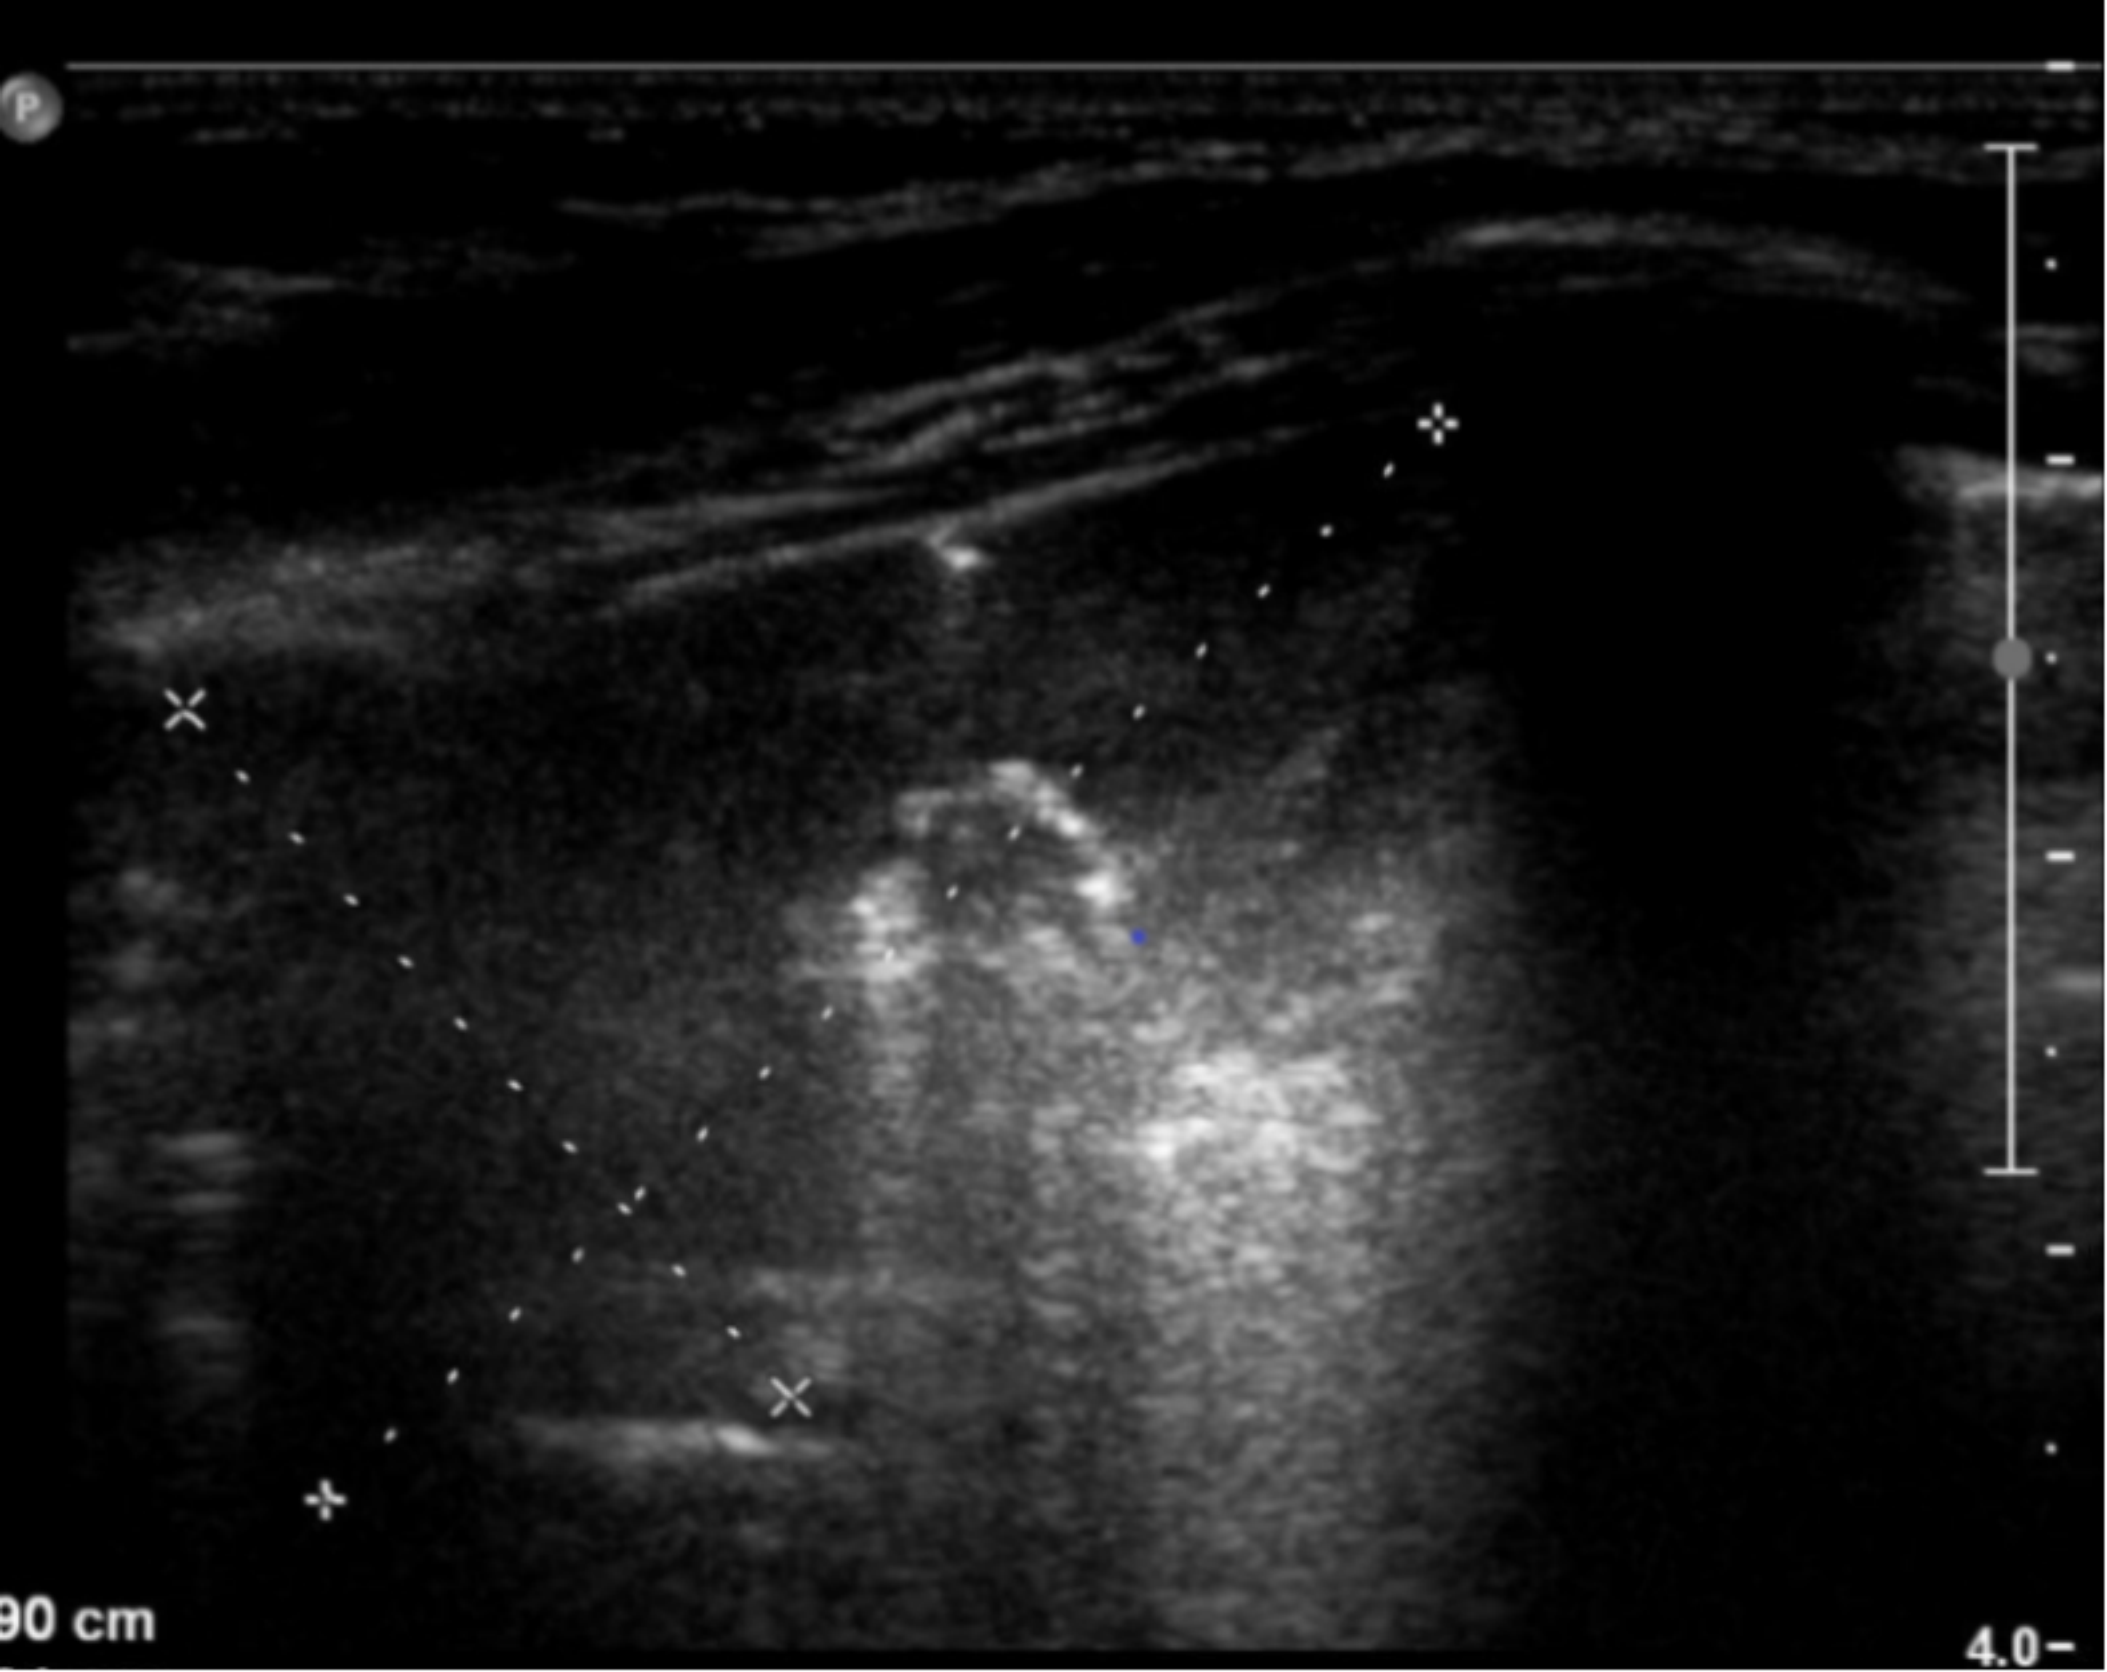

Figure



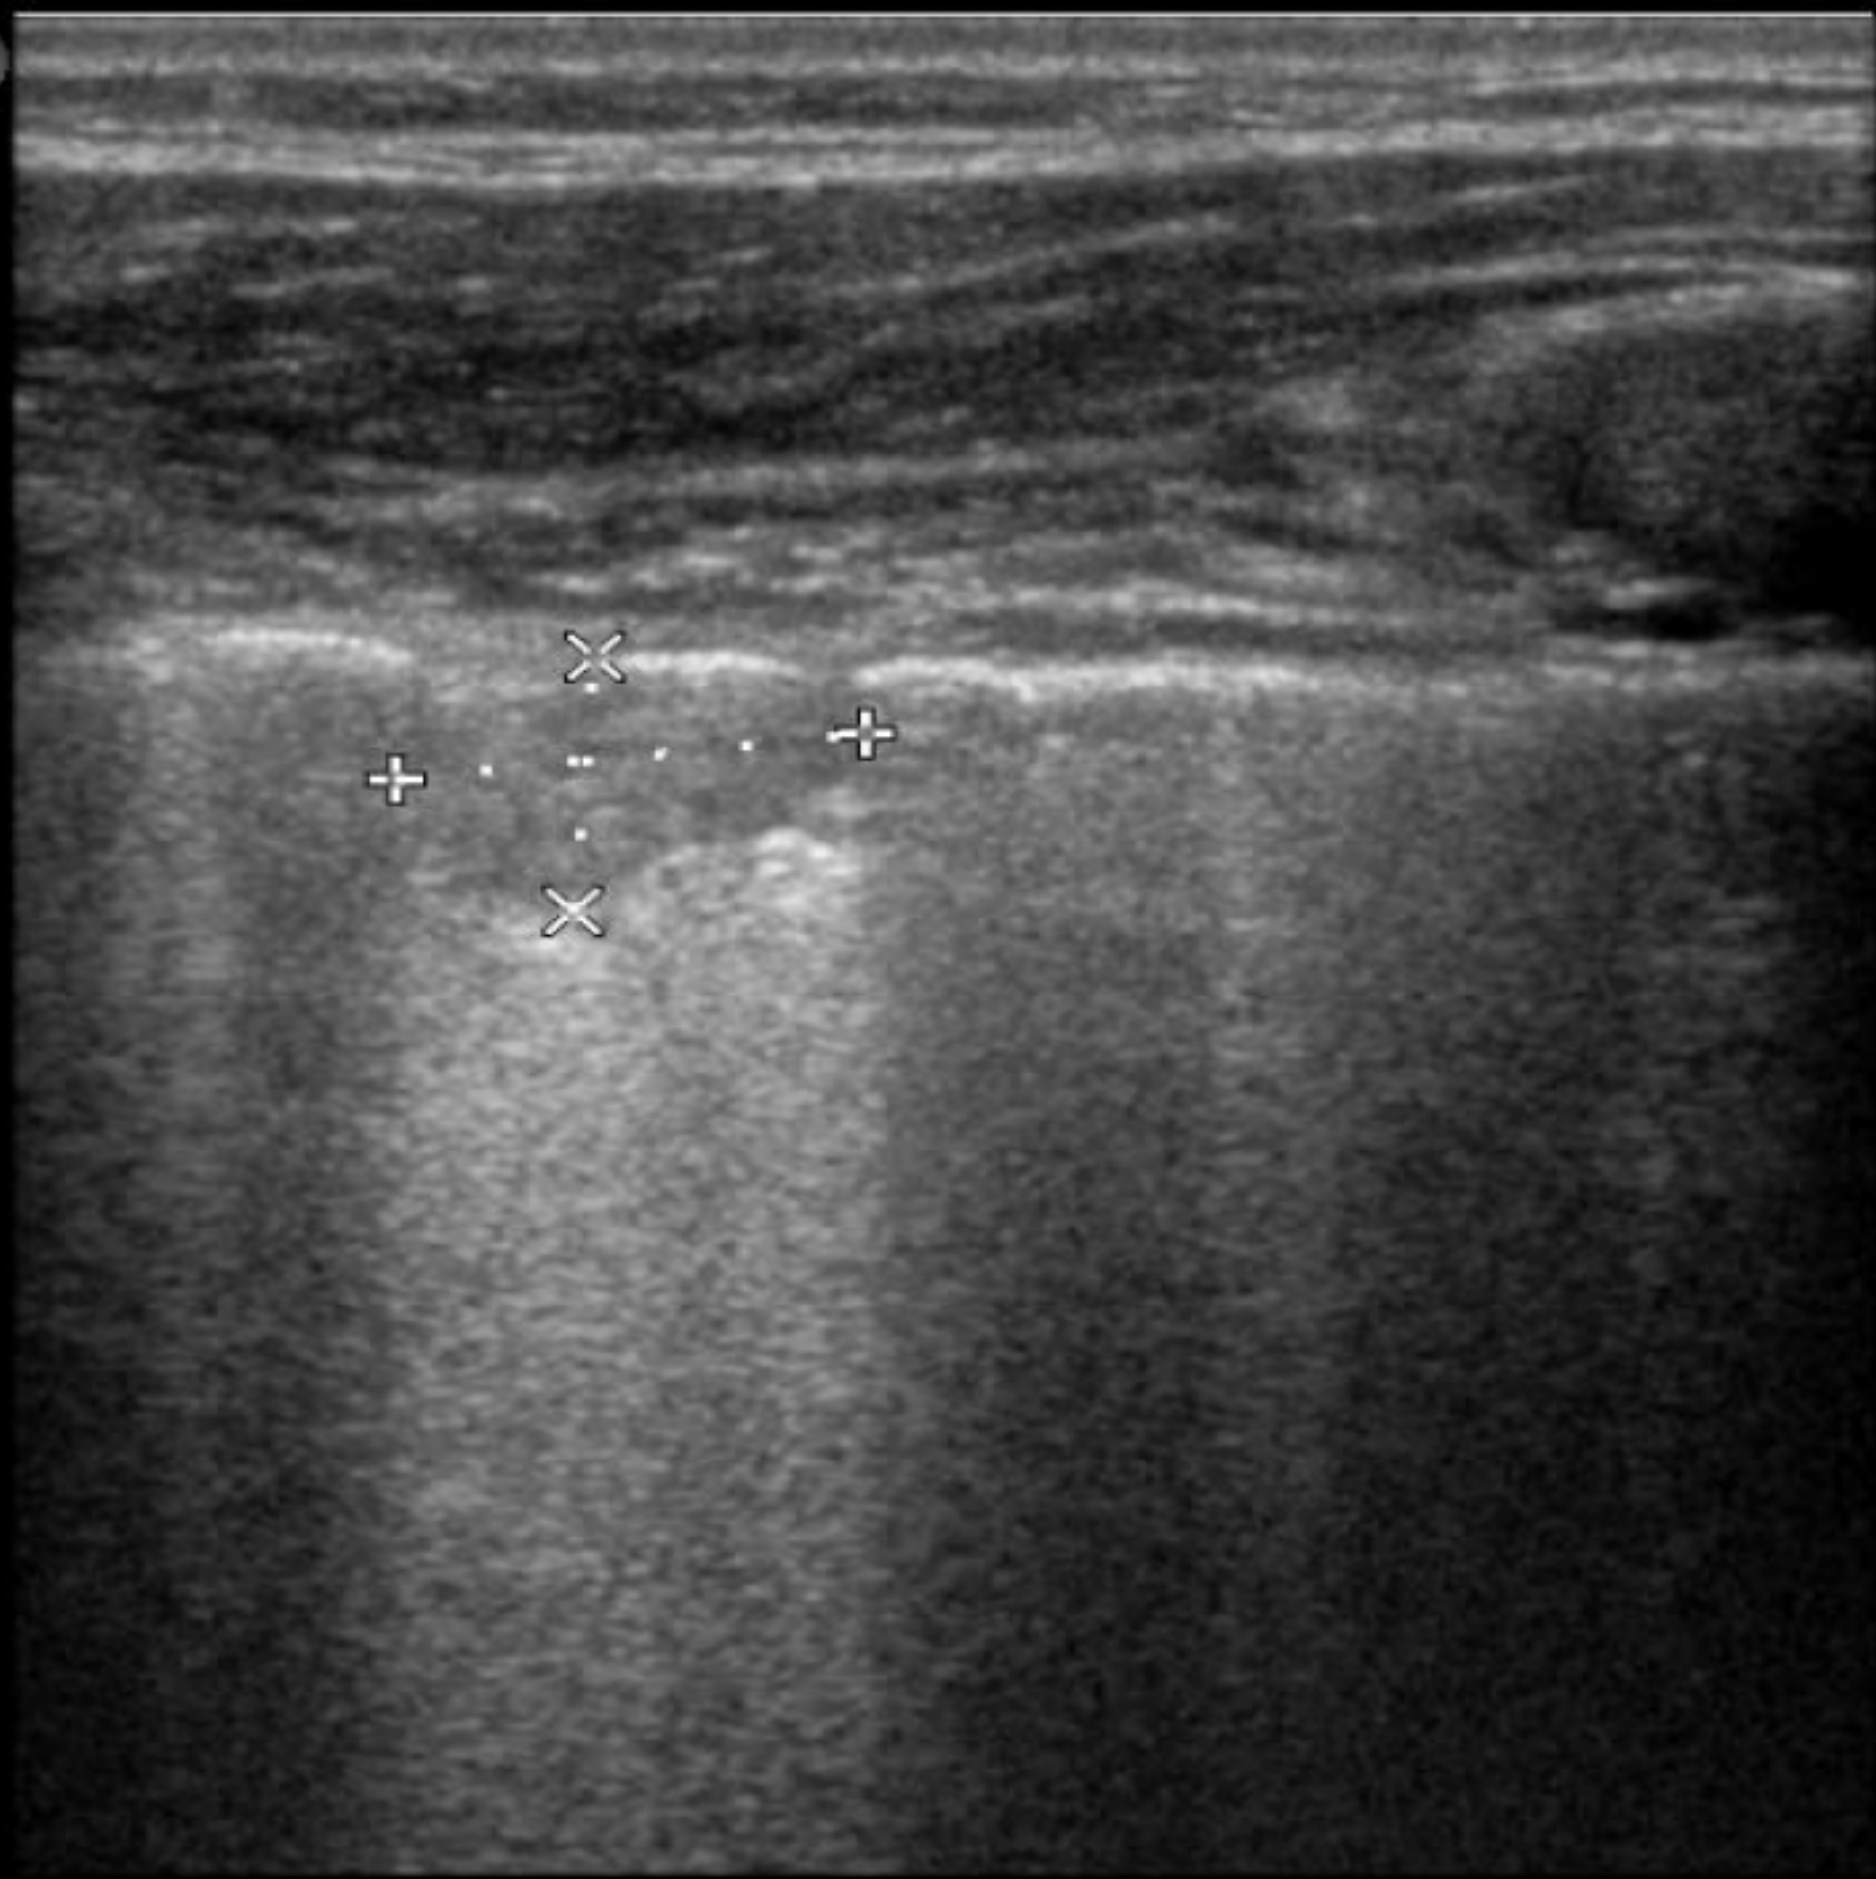

Figure
